# Supplementary material for: A cross-sectional study of hearing thresholds among 4627 Norwegian train and track maintenance workers
Source: PubMed Central journal article supplement — BMJ Open. 2014 Oct 16;4(10):e005529. doi: 10.1136/bmjopen-2014-005529 (PMC4202010; doi:10.1136/bmjopen-2014-005529), 2014-10-16
Supplement: bmjopen-2014-005529.draft_revisions.pdf [file bmjopen-2014-005529.draft_revisions.pdf]

# BMJ Open

## A cross-sectional study of hearing thresholds among 4627 Norwegian train and track maintenance workers

|                                 |                                                                                                                                                                                                                                                                                                                                                                                                                                                                                            |
|---------------------------------|--------------------------------------------------------------------------------------------------------------------------------------------------------------------------------------------------------------------------------------------------------------------------------------------------------------------------------------------------------------------------------------------------------------------------------------------------------------------------------------------|
| Journal:                        | <i>BMJ Open</i>                                                                                                                                                                                                                                                                                                                                                                                                                                                                            |
| Manuscript ID:                  | bmjopen-2014-005529                                                                                                                                                                                                                                                                                                                                                                                                                                                                        |
| Article Type:                   | Research                                                                                                                                                                                                                                                                                                                                                                                                                                                                                   |
| Date Submitted by the Author:   | 24-Apr-2014                                                                                                                                                                                                                                                                                                                                                                                                                                                                                |
| Complete List of Authors:       | Lie, Arve; STAMI, Occ med & epidemiology; Norwegian State Railways (NSB) Occupational Health Service, Oslo, Norway, Skogstad, Marit; National Institute of Occupational Health, Occupational Medicine and Epidemiology<br>Johnsen, Torstein; Norwegian State Railways (NSB) Occupational Health Service, Oslo, Norway,<br>Engdahl, Bo; Norwegian Institute of Public Health, Division of Mental Health<br>Tambs, Kristian; Norwegian Institute of Public Health, Division of Mental Health |
| <b>Primary Subject Heading</b>: | Occupational and environmental medicine                                                                                                                                                                                                                                                                                                                                                                                                                                                    |
| Secondary Subject Heading:      | Occupational and environmental medicine, Epidemiology                                                                                                                                                                                                                                                                                                                                                                                                                                      |
| Keywords:                       | PREVENTIVE MEDICINE, EPIDEMIOLOGY, OCCUPATIONAL & INDUSTRIAL MEDICINE, Audiology < OTOLARYNGOLOGY                                                                                                                                                                                                                                                                                                                                                                                          |
|                                 |                                                                                                                                                                                                                                                                                                                                                                                                                                                                                            |

SCHOLARONE™  
Manuscripts

only

1  
2  
3  
4  
5  
6  
7 **A cross-sectional study of hearing thresholds among 4627 Norwegian train and track**  
8 **maintenance workers**  
9

10 Arve Lie, MD<sup>12</sup>

11 Marit Skogstad, PhD<sup>1</sup>

12 Torstein Seip Johnsen, MD<sup>2</sup>

13 Bo Engdahl, PhD<sup>3</sup>

14 Kristian Tambs, PhD<sup>3</sup>

15  
16  
17  
18  
19  
20  
21 <sup>1</sup>: Department of Occupational Medicine and Epidemiology,

22 National Institute of Occupational Health, Oslo, Norway

23  
24 <sup>2</sup>: Norwegian State Railways (NSB) Occupational Health Service, Oslo, Norway

25  
26  
27 <sup>3</sup>: Norwegian Institute of Public Health, Oslo, Norway  
28  
29  
30

31 **Running title:**

32 Hearing thresholds among railway maintenance workers

33  
34 Corresponding author: Arve Lie, National Institute of Occupational Health, P.O. Box 8149

35  
36 Dep., N-0033 Oslo, Norway. Telephone: +4723195396, Fax : +4723195202,

37  
38 e-mail address: arve.lie@stami.no  
39

40  
41 **Word count article core:** 2225.

42  
43 **Word count abstract:** 250.

44  
45 **Number of figures and tables:** 4.

46  
47 **Number of references:** 19.  
48  
49  
50  
51  
52  
53  
54  
55  
56  
57  
58  
59  
60

## Abstract

### Background

Railway workers performing maintenance work of trains and tracks could be at an increased risk of developing noise induced hearing loss, since they are exposed to noise levels of 75- 90 dB(A) with peak exposures of 130-140 dB(C).

### Objective

To study hearing thresholds among train and track maintenance workers and to compare the results with reference groups not exposed to noise.

### Methods

The most recent audiogram from a total of 1897 male train and 2730 track maintenance workers were obtained from the medical records of the occupational health service of the Norwegian State Railways (NSB), the largest Norwegian railway company. The results were compared with audiograms from a control group of 2872 male railway traffic controllers and office workers not exposed to noise and with reference values from the ISO 1999:2013. The frequencies from 0.5 to 8 kHz of the better ear and the prevalence of audiometric notches ( $\geq 25$  dB (A) at 4 kHz) were used for comparison.

### Results

The train and track maintenance workers 45 years or older had a small mean hearing loss in the 3-6 kHz area of 3-5 dB and a higher prevalence of audiometric notches (25% vs. 17%) compared to the controls. The hearing loss was smaller among workers younger than 45 years.

### Conclusion

Train and track maintenance workers 45 years or older on average have a slightly stronger hearing loss and more audiometric notches compared to reference groups not exposed to noise. Younger (<45 years) workers have hearing thresholds comparable to the reference groups.

**Strengths and limitations of the study**

## Strengths:

- The size of the study with close to 100% participation rate
- The use of two groups for comparison
- High quality of the audiometric data and exposure assessment

## Limitations:

- Cross sectional study with only the most recent audiogram from the participants

For peer review only

## Introduction

Noise induced hearing loss (NIHL) accounts for more than 60 percents of occupational disorders reported to the Norwegian Labor Inspection Authority [1]. Age is, however, the main cause for hearing loss[2]. Heritability, gender, smoking, high blood pressure, diabetes, high cholesterol level, the use of ototoxic medication and exposure to ototoxic chemicals may affect the hearing and so may leisure time noise, first and foremost from the use of firearms[3-5].

Train and track maintenance workers are occupationally exposed to noise. Noise measurements in the railway companies that we have studied reveal average 8 hour noise exposure levels of 75-90 dB(A) in both groups with peak exposures reaching 130-140 dB(C).

In studies of train and track maintenance workers, noise induced hearing loss has been described by Virokannas[6], but the exposure levels were much higher than in our study. In the US National Health Interview Survey, railroad employees had the highest prevalence of hearing difficulties among the occupational groups examined, but the study did not present audiometric data, only self reported symptoms[7].

Norwegian physicians are legally obliged to report occupational diseases, such as NIHL, to the Norwegian Labour Inspection Authority. More than 70 percents of the male 20-64 year old workers that we have studied, have an audiogram meeting the national criteria for NIHL, namely a sufficiently strong noise exposure and a hearing loss of 25 dB or more at either 3, 4 or 6 kHz or 20 dB or more for all of 3, 4 and 6 kHz, worse ear, not adjusted for age or sex[8].

A recent study of hearing status among train drivers and train conductors in the Norwegian State Railways showed normal mean hearing threshold for their age[9]. Still many of them, just like the maintenance workers that we have studied, had audiograms compatible with the Norwegian criteria for NIHL.

The aim of this cross-sectional study was to assess the risk of noise induced hearing loss among train and track maintenance workers by comparing their audiograms with audiograms from a reference group of railway workers not exposed to noise and a Norwegian reference population (HUNT)[10] which recently has been included in the 2013 revision of the ISO 1999 reference data base[11].

## Methods

### *Exposure assessment*

As a part of the risk assessment of the train and track maintenance workers, the occupational hygienists of the OH service has conducted an extensive programme of measurements of the noise exposure by dosimetry and peak noise measurements. The exposure shows a high variability, depending on the type of work being done. On an 8 hour average level the exposure varies from 75 dB(A) up to 90 dB(A), averaging 85-86 dBA, and with peak exposures up to 130 dB(C) - 140 dB(C). Since the workers should wear hearing protection when the exposure exceeds 85 dB(A), the actual exposure to the ear will become somewhat lower.

### *The study group*

1  
2  
3 Most of the train and track maintenance workers have to perform an audiometric test as a part of a  
4 mandatory health assessment due to national and European Union regulations for railway safety  
5 personnel. In order to be certified, the test is to be done before employment and later, depending on  
6 age, with 1-5 year intervals. All the tests are conducted by the occupational health service (OHS) of  
7 the Norwegian state railways (NSB).  
8  
9

10 The most recent available audiogram of the participating subjects, recorded during the period 1994-  
11 2011, was obtained from the electronic medical records along with age, sex and type of job  
12 information. Since there were only a few female maintenance workers, only male workers were  
13 used in the analysis.  
14

15 Audiograms from the train and track maintenance workers were compared with those of a control  
16 group of non-exposed male railway office workers, mainly doing traffic controlling, and with a similar  
17 social and educational background and salary as the maintenance workers. The study population was  
18 also compared with external reference data from the ISO 1999: 2013, annex B, table 2, based on a  
19 Norwegian reference population[11].  
20  
21

### 22 *Audiotory examination*

23  
24 Madsen Xeta Otometrics pure tone audiometric testing using a TDH-39P earphone headset in a  
25 soundproof booth at frequencies of 0.25, 0.5, 1, 2, 3, 4, 6 and 8 kHz was performed by trained  
26 nurses. The audiometric test was done in line with standard procedures according to the Norwegian  
27 Labour Inspection Authority[8]. The audiometer was calibrated every second year according to the  
28 requirements of the equipment provider.  
29  
30

31 Since grouped median and percentile values are used in the ISO 1990: 2013, the same values of the  
32 hearing threshold of frequencies from 0.5- 8 kHz from the better ear were computed and compared  
33 to the values from reference groups.  
34  
35

36 The prevalence of notches was calculated since audiometric notches are regarded as an indicator of  
37 NIHL[12]. A notch regarded as a hearing loss was  $\geq 25$  dB(A) at 4kHz and a difference in hearing loss  
38 between 4kHz and 2 and 8 kHz  $\geq 10$ dB(A)[13].  
39  
40

41 Finally, the prevalence of hearing loss meeting the Norwegian NIHL criteria, a hearing loss of 25 dB or  
42 more at either 3, 4 or 6 kHz or 20 dB or more for all of 3, 4 and 6 kHz, worse ear, was computed and  
43 compared to the reference group.  
44

### 45 *Ethical considerations*

46  
47 The audiograms have been obtained as a part of regular occupational health services work. Risk  
48 assessment of NIHL is a part of the OHS tasks. Therefore an application to the regional ethical  
49 committee is not necessary according to Norwegian regulations.  
50  
51

### 52 *Statistics*

53  
54 Descriptive statistics were used in this study. Groups were compared using chi-square tests for  
55 categorical variables and ANOVA for continuous variables. The data analysis was performed using  
56 SPSS (IBM SPSS Statistics Version 20) with percentile values estimated by the FREQUENCIES  
57 /GROUPED command[14]. A significance level of 5% was chosen.  
58  
59  
60

## Results

Audiograms from 1897 train- and 2730 track maintenance workers, all males, were compared to audiograms from 2872 male railway office workers working as traffic controllers or in other types of jobs without any significant noise exposure.

An overview of age distribution in the train- and track maintenance workers and non-exposed office workers is shown in table 1.

Table 1: Background data and noise exposure in male train and track maintenance workers compared to an internal male non noise exposed reference group.

|                                     | Age   | Train maintenance | Track maintenance | Internal ref. | P                   |
|-------------------------------------|-------|-------------------|-------------------|---------------|---------------------|
| Age, mean (SD)                      |       | 47.6 (11.9)       | 46.2 (13.0)       | 45.7 (11.8)   | <0.001 <sup>a</sup> |
| Age, N=                             | -24   | 118               | 286               | 129           |                     |
|                                     | 25-34 | 225               | 275               | 504           |                     |
|                                     | 35-44 | 330               | 529               | 692           |                     |
|                                     | 45-54 | 555               | 801               | 738           |                     |
|                                     | 55-64 | 669               | 839               | 809           |                     |
|                                     | Total | 1897              | 2730              | 2872          |                     |
| Occupational noise exposure (dB(A)) |       | 75-90 + peak      | 75-90 + peak      | < 70          |                     |

<sup>a</sup>) ANOVA

The average age and the distribution of age were similar in the 3 groups. The noise exposure of the train and track maintenance workers is in the order of 75-90 dB(A). In addition there may be peak exposures of 130-140 dB(C). Hearing protection in terms of ear muffs or ear plugs is to be used when the noise exposure exceeds 80 dB(A).

Figure 1 shows the grouped median values of the hearing thresholds of the maintenance workers, the internal control group and the ISO 1999. The largest difference between the noise exposed and the control groups, 2-7 dB for 3 kHz and 4 kHz, was found for the age groups 45 years or older compared with the control groups. The grouped 90 percentile (figure 2) of the hearing thresholds reveals similar findings with an elevated hearing threshold of 6-10 dB in the same age groups of the noise exposed workers compared to the control groups. In the younger age groups (25-44 years) there are only minor differences between those with noise exposure compared to the internal control group and ISO-standards.

The prevalences of audiometric notches in the maintenance workers compared with the internal control group are shown in table 2.

Table 2: Hearing loss (better ear) and prevalence of audiometric notches (worse ear) and NIHL (worse ear) in male train and track maintenance workers compared to an internal male non noise exposed reference group.

|                                                        | Age   | Train maintenance | Track maintenance          | Internal ref. | P                  |
|--------------------------------------------------------|-------|-------------------|----------------------------|---------------|--------------------|
| Hearing loss mean 3,4 and 6 kHz, better ear (95% CI)   |       |                   |                            |               |                    |
|                                                        | -24   | 2.3(0.8-3.7)      | 1.1(-0.1-2.3) <sup>b</sup> | 0 (Ref)       |                    |
|                                                        | 25-34 | 0.8(-0.5-2.1)     | 0.0(-1.2-1.3)              | 0 (Ref)       |                    |
|                                                        | 35-44 | 1.8(0.3-3.3)      | 1.1(-0.2-2.4)              | 0 (Ref)       |                    |
|                                                        | 45-54 | 3.3(1.6-5.0)      | 3.1(1.5-4.6)               | 0 (Ref)       |                    |
|                                                        | 55-64 | 4.6(2.5-6.6)      | 4.9(2.9-6.8)               | 0 (Ref)       |                    |
|                                                        | Total | 4.6(3.5-5.6)      | 3.2(2.3-4.2)               | 0 (Ref)       |                    |
| Audiometric notch, prevalence, worse ear (%)           |       |                   |                            |               |                    |
|                                                        | -24   | 3                 | 3                          | 3             | 0.96 <sup>c</sup>  |
|                                                        | 25-34 | 10                | 9                          | 7             | 0.26               |
|                                                        | 35-44 | 21                | 19                         | 13            | 0.002              |
|                                                        | 45-54 | 29                | 33                         | 20            | <0.001             |
|                                                        | 55-64 | 36                | 35                         | 22            | <0.001             |
|                                                        | Total | 25                | 25                         | 16            | <0.001             |
| NIHL criteria hearing loss, prevalence, worse ear, (%) |       |                   |                            |               |                    |
|                                                        | -24   | 26                | 21                         | 20            | 0.432 <sup>a</sup> |
|                                                        | 25-34 | 36                | 29                         | 28            | 0.116              |
|                                                        | 35-44 | 63                | 56                         | 50            | <0.001             |
|                                                        | 45-54 | 87                | 85                         | 74            | <0.001             |
|                                                        | 55-64 | 95                | 95                         | 92            | 0.005              |
|                                                        | Total | 76                | 70                         | 63            | <0.001             |

<sup>a</sup>) ANOVA <sup>b</sup>) ANOVA, Bonferroni post hoc <sup>c</sup>) Chi- square test

An increase in audiometric notches in all groups with increasing age is revealed with a significant higher prevalence in the exposed groups compared with the control group from the age of 35. In the younger age groups the hearing and prevalence of notches is comparable to that of the controls group.

The prevalence of the Norwegian criteria for NIHL is in line with the audiometric notches found in the present study (table 2). The prevalence of audiometric NIHL criteria is almost as high in the reference group (64%) as in the train- and track maintenance workers (70-76%). The results indicate that there is only a small, but significant noise induced hearing loss in the noise sensitive area (3-6 kHz) in the exposed workers from the age of 35.

## Discussion

This cross-sectional study of 4627 male train- and track maintenance workers demonstrates hearing thresholds similar to that of the non-exposed groups, but the oldest workers have a small, but significant hearing loss with more notched audiograms than the control group. This indicates a small noise induced hearing loss (NIHL) in the noise exposed groups. The magnitude of the hearing loss of the noise sensitive area (3-6 kHz) is in the order of 5 dB or less, which is about as expected. According to ISO 1999[11] an unprotected noise exposure of 85 and 90 dB(A) at an 8 hour daily basis will lead to a median expected hearing loss of 4 dB and 9 dB, respectively, after 10 years of exposure.



1  
2  
3 The hearing of the younger workers is close to normal. This is probably due to better preventive  
4 measures, such as the use of noise protection and the use of hearing protection, during the last years  
5 and in line with studies of similar noise-exposed groups in the developed world[15-17] . The workers  
6 45 years or older, however, had a small noise-induced hearing loss. This could be due to former high  
7 levels of workplace noise. This finding is also in line with previous studies showing that railroad  
8 workers are at risk of getting NIHL[6 7].  
9

10  
11 This present study has some strengths. The number of maintenance workers is large and so are the  
12 control groups. We also assess the audiometric measurements to be of good quality. Since  
13 audiometric testing is mandatory for most of the workers, we assume that the participation rate is  
14 close to 100 %. The use of two comparison groups strengthens the study. The results from the two  
15 comparison groups are very similar. Furthermore, the internal control group of office workers was  
16 examined by the same OHS professionals and with the same audiometric equipment as were the  
17 train and track maintenance workers.  
18  
19

20  
21 There are, however, also some limitations of this study.  
22

23 This cross sectional assessment is based on only one audiogram from each of the participants, the  
24 most recent measurement. Longitudinal data would be favorable in such a study, because selective  
25 drop-out may have occurred. Since selection in and selection out of work due to hearing loss is quite  
26 uncommon, we believe that the limitation of using cross-sectional data in this study is of limited  
27 importance.  
28

29  
30 Information of factors other than noise that may modify hearing loss such as smoking, high blood  
31 pressure, metabolic syndrome, diabetes, exposure to ototoxic medication or chemicals, leisure time  
32 noise exposure etc were not available. Thus possible confounders were not assessed. The  
33 maintenance workers have probably been more exposed to chemicals than the reference groups. For  
34 the other factors we have no reason to believe that they would influence the results since we doubt  
35 that they have a different prevalence among the workers compared with the controls.  
36  
37

38 Most of the maintenance workers went through a health examination before they were employed,  
39 and a severe hearing loss would normally have been regarded as a disqualification preventing  
40 employment. One may therefore expect some selection at recruitment. The requirements regarding  
41 hearing acuity are not very strict, however, and identical for the maintenance workers and the  
42 control group of railway workers. Selection would be expected to result in superior hearing in the  
43 maintenance workers compared to the control groups in the youngest age groups, but this is not the  
44 case in our study. We therefore believe that selection factors are of minor importance.  
45  
46

47 We are lacking information of years of employment for the maintenance workers and even for the  
48 office workers. Most of the train- and track maintenance workers, however, are recruited at an early  
49 age and are quite stable with only a small turnover. The same is the case for the office personnel.  
50 We cannot rule out the possibility that these groups have had a previous job with occupational noise  
51 exposure, but we assess the possibility for this to influence the results to a significant degree to be  
52 unlikely.  
53  
54

55  
56 Before we conducted this study, there was a general understanding that train and track maintenance  
57 workers are at risk for getting noise induced hearing loss. Based on individual assessments of workers  
58  
59  
60

1  
2  
3 and their audiograms and using the diagnostic guidelines of the Norwegian Labor Inspection  
4 Authority, 70 to 76 percent were suspected to have NIHL. The prevalence according to these criteria  
5 was 63 percent in the internal control group with office workers. This indicates that the use of these  
6 criteria has strong limitations with respect to the validly diagnosing noise induced hearing loss.  
7

8  
9 To distinguish between noise induced and age related hearing loss based on audiograms only is  
10 problematic. Some indications of differences may be given by audiometric notches, but they are also  
11 present in workers without any noise exposure as shown in the present and other studies[18 19] .  
12

13 In conclusion, this cross-sectional study has detected a small average hearing loss among the older  
14 part of the 4627 male train and track maintenance workers compared with non-exposed workers in  
15 the same company and reference values from ISO 1999: 2013.  
16  
17  
18  
19  
20  
21

## 22 **Figure legends**

23  
24 Figure 1: Hearing threshold of male train and track maintenance workers compared to ISO 1999:2013  
25 and an internal reference group of office workers. 50 percentile.  
26

27 Figure 2: Hearing threshold of male train and track maintenance workers compared to ISO 1999:2013  
28 and an internal reference group of office workers. 90 percentile.  
29  
30  
31  
32  
33

### 34 **What this paper adds:**

- 35 • Previous studies have suggested that railway maintenance workers are at risk for the development of noise induced hearing loss (NIHL).
  - 36 • This study has detected only small hearing loss among older maintenance workers compared to reference values.
  - 37 • Hearing loss meeting national criteria for NIHL and audiometric notches are highly prevalent among workers not exposed to noise and are therefore of limited use in the diagnosis of NIHL.
- 38  
39  
40  
41  
42  
43  
44  
45  
46  
47  
48  
49  
50  
51  
52  
53  
54  
55  
56  
57  
58  
59  
60

## Acknowledgement

Per Frode Hove, Ingvill M. Hornkjøl and the rest of the staff at the Norwegian State Railways (NSB) Occupational Health Service are greatly acknowledged for providing exposure data, data from the medical records, and for valuable criticism and advice

## Contributorship statement

Arve Lie and Marit Skogstad have written the first draft of manuscript. Bo Engdahl and Kristian Tambs have given valuable advice on the manuscript and statistics. Torstein Seip Johnsen has provided the data from the OHS and has also been involved in the forming of the manuscript.

All the authors have given substantial contributions to conception and design, acquisition of data, analysis and interpretation of data, drafting and revising of the article and final approval of the version to be published.

## Competing Interests

There are no competing interests

## Data Sharing Statement

No additional data are available

## References

1. Samant Y, Parker D, Wergeland E, et al. The Norwegian Labour Inspectorate's Registry for Work-Related Diseases: data from 2006. *Int J Occup Environ Health* 2008;**14**(4):272-79
2. Cruickshanks KJ, Wiley TL, Tweed TS, et al. Prevalence of hearing loss in older adults in Beaver Dam, Wisconsin. The Epidemiology of Hearing Loss Study. *AmJ Epidemiol* 1998;**148**(9):879-86
3. Le Prell CG, Henderson D. Perspectives on Noise-Induced Hearing Loss. In: Le Prell CG, Henderson D, Fay RR, et al., eds. *Noise induced hearing loss*: Springer New York, 2012:1-10.
4. Kvestad E, Czajkowski N, Krog NH, et al. Heritability of hearing loss. *Epidemiology* 2012;**23**(2) doi: <http://graphics.tx.ovid.com/ovftpdfs/FPDDNCMCPCCKCCD00/fs046/ovft/live/gv025/00001648/00001648-201203000-00023.pdf>[published Online First: Epub Date]].
5. Tambs K, Hoffman HJ, Borchgrevink HM, et al. Hearing loss induced by noise, ear infections, and head injuries: results from the Nord-Trøndelag Hearing Loss Study. *IntJ Audiol* 2003;**42**(2):89-105
6. Virokannas H, Anttonen H, Niskanen J. Health risk assessment of noise, hand-arm vibration and cold in railway track maintenance. *International Journal of Industrial Ergonomics* 1994;**13**(3) doi: <http://search.proquest.com/docview/16839998?accountid=28229>[published Online First: Epub Date]].
7. Tak S, Calvert GM. Hearing difficulty attributable to employment by industry and occupation: an analysis of the National Health Interview Survey--United States, 1997 to 2003. *J Occup Environ Med* 2008;**50**(1):46-56
8. The Norwegian Labour Inspection Authority. *Audiometric testing in noise exposed workers (in Norwegian)*, 2013.

- 1
- 2
- 3 9. Lie A, Skogstad M, Johnsen TS, et al. Hearing status among Norwegian train drivers and train
- 4 conductors. *Occup Med (Lond)* 2013;**63**(8):544-48
- 5 10. Engdahl B, Tambs K, Borchgrevink HM, et al. Screened and unscreened hearing threshold levels
- 6 for the adult population: results from the Nord-Trondelag Hearing Loss Study. *Int J Audiol*
- 7 2005;**44**(4) doi:
- 8 [http://ovidsp.ovid.com/ovidweb.cgi?T=JS&CSC=Y&NEWS=N&PAGE=fulltext&D=med4&AN=1](http://ovidsp.ovid.com/ovidweb.cgi?T=JS&CSC=Y&NEWS=N&PAGE=fulltext&D=med4&AN=16011050)
- 9 <http://metalib1.bibits.no:3410/stami?sid=OVID:medline&id=pmid:16011050&id=doi:&issn=1499-2027&isbn=&volume=44&issue=4&spage=213&pages=213-30&date=2005&title=International+Journal+of+Audiology&atitle=Screened+and+unscreened+hearing+threshold+levels+for+the+adult+population%3A+results+from+the+Nord-Trondelag+Hearing+Loss+Study.&aust=Engdahl&pid=%3Cauthor%3EEngdahl+B%3BTambs+K%3BBorchgrevink+HM%3BHoffman+HJ%3C%2Fauthor%3E%3CAN%3E16011050%3C%2FAN%3E%3CDT%3EComparative+Study%3C%2FDT%3E>;
- 10 [http://www.ingentaconnect.com/content](http://www.ingentaconnect.com/content/apl/tija/2005/00000044/00000004/art00004?token=00501d51bdb1722824b785c5f3b3b47464748773b62702379462a314f582a2f4876753375686f491)
- 11 [http://www.ingentaconnect.com](http://www.ingentaconnect.com/content/apl/tija/2005/00000044/00000004/art00004?token=00521ce4f63ff1592d6b5a666f3a7b6c7b4072423847656636786a49264f65263a3d4f58762f463f9b)
- 12 [/content/apl/tija/2005/00000044/00000004/art00004?token=00501d51bdb1722824b785c5f3b3b47464748773b62702379462a314f582a2f4876753375686f491](http://www.ingentaconnect.com/content/apl/tija/2005/00000044/00000004/art00004?token=00521ce4f63ff1592d6b5a666f3a7b6c7b4072423847656636786a49264f65263a3d4f58762f463f9b);
- 13 [http://www.ingentaconnect.com](http://www.ingentaconnect.com/content/apl/tija/2005/00000044/00000004/art00004?token=00521ce4f63ff1592d6b5a666f3a7b6c7b4072423847656636786a49264f65263a3d4f58762f463f9b)
- 14 [/content/apl/tija/2005/00000044/00000004/art00004?token=00521ce4f63ff1592d6b5a666f3a7b6c7b4072423847656636786a49264f65263a3d4f58762f463f9b](http://www.ingentaconnect.com/content/apl/tija/2005/00000044/00000004/art00004?token=00521ce4f63ff1592d6b5a666f3a7b6c7b4072423847656636786a49264f65263a3d4f58762f463f9b)[published Online First:
- 15 Epub Date]].
- 16 11. International Organization for S. ISO 1999. Acoustics - Estimation of noise-induced hearing loss. International Standard 2013;**1999: 2013 (E)**(1)
- 17 12. McBride D, Williams S. Characteristics of the audiometric notch as a clinical sign of noise exposure. *Scand Audiol* 2001;**30**(2):106-11
- 18 13. Mahboubi H, Zardouz S, Oliaei S, et al. Noise-induced hearing threshold shift among US adults and implications for noise-induced hearing loss: National Health and Nutrition Examination Surveys. *EurArchOtorhinolaryngol* 2012
- 19 14. Hyndman RJ, Fan Y. Sample quantiles in statistical packages. *The American Statistician* 1996;**50**(4):361-65
- 20 15. Rubak T, Kock SA, Koefoed-Nielsen B, et al. The risk of noise-induced hearing loss in the Danish workforce. *Noise Health* 2006;**8**(31):80-87
- 21 16. Bruehl P, Ivarsson A, Toremalin NG. Noise-induced hearing loss in an automobile sheet-metal pressing plant. *Scandinavian Audiology* 1994;**23**(2) doi:
- 22 <http://search.proquest.com/docview/16925435?accountid=28229>[published Online First:
- 23 Epub Date]].
- 24 17. Engdahl B, Tambs K. Occupation and the risk of hearing impairment - results from the Nord-Trondelag study on hearing loss. *Scandinavian Journal of Work Environment & Health* 2010;**36**(3) doi: <Go to ISI>://WOS:000277171000008[published Online First: Epub Date]].
- 25 18. Nondahl DM, Shi X, Cruickshanks KJ, et al. Notched audiograms and noise exposure history in older adults. *Ear Hear* 2009;**30**(6):696-703
- 26 19. Osei-Lah V, Yeoh LH. High frequency audiometric notch: An outpatient clinic survey. *Int J Audiol* 2010;**49**(2) doi:
- 27 <http://informahealthcare.com/doi/pdfplus/10.3109/14992020903300423>[published Online First: Epub Date]].
- 28
- 29
- 30
- 31
- 32
- 33
- 34
- 35
- 36
- 37
- 38
- 39
- 40
- 41
- 42
- 43
- 44
- 45
- 46
- 47
- 48
- 49
- 50
- 51
- 52
- 53
- 54
- 55
- 56
- 57
- 58
- 59
- 60

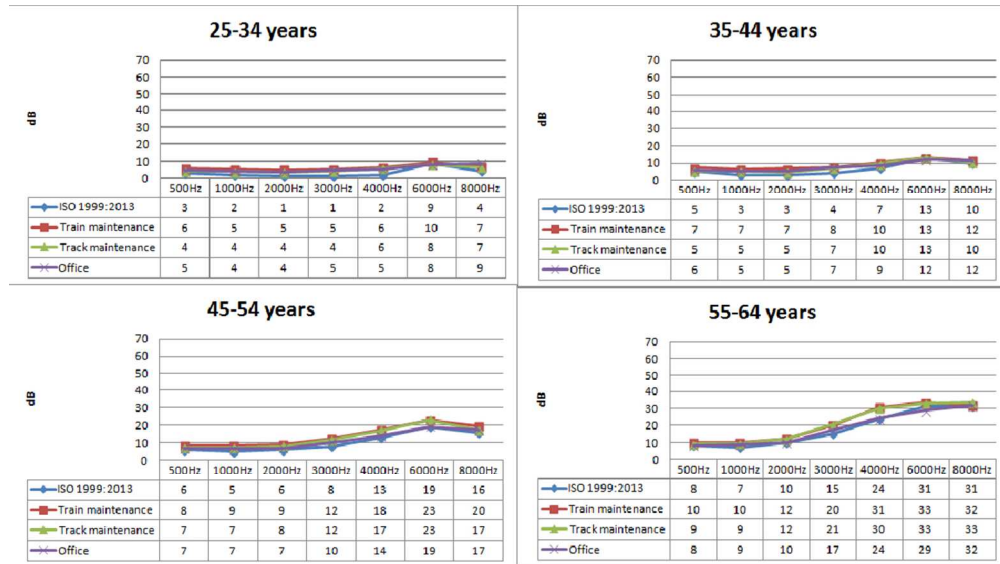

Hearing threshold of male train and track maintenance workers compared to ISO 1999:2013 and an internal reference group of office workers. 50 percentile.  
304x171mm (96 x 96 DPI)

review only

1  
2  
3  
4  
5  
6  
7  
8  
9  
10  
11  
12  
13  
14  
15  
16  
17  
18  
19  
20  
21  
22  
23  
24  
25  
26  
27  
28  
29  
30  
31  
32  
33  
34  
35  
36  
37  
38  
39  
40  
41  
42  
43  
44  
45  
46  
47  
48  
49  
50  
51  
52  
53  
54  
55  
56  
57  
58  
59  
60

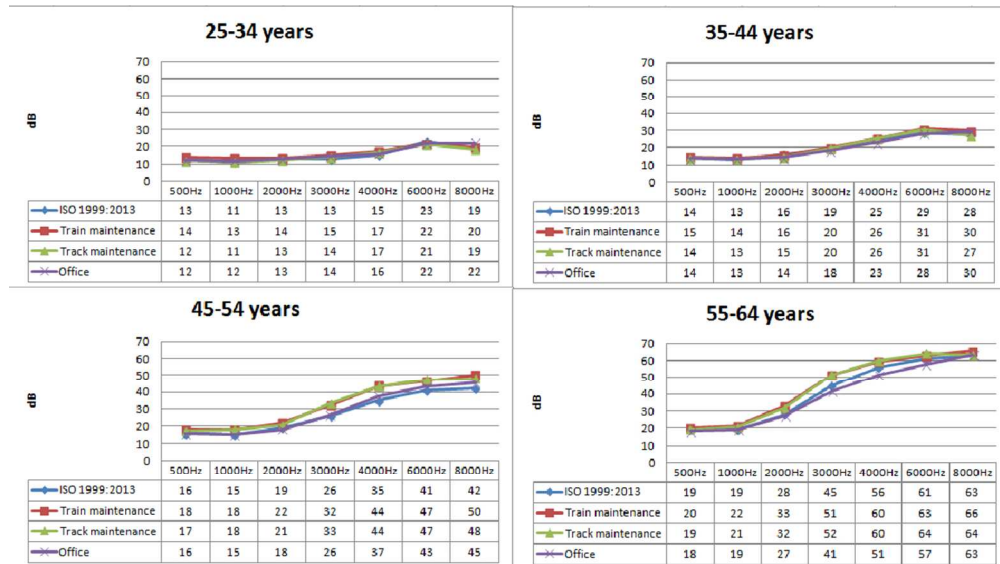

Hearing threshold of male train and track maintenance workers compared to ISO 1999:2013 and an internal reference group of office workers. 90 percentile.  
304x171mm (96 x 96 DPI)

review only

## STROBE Statement—checklist of items that should be included in reports of observational studies

|                              | Item No | Recommendation                                                                                                                                                                                                                                                                                                                                                                                                                                                                                                                                                                                                                                                                                   |
|------------------------------|---------|--------------------------------------------------------------------------------------------------------------------------------------------------------------------------------------------------------------------------------------------------------------------------------------------------------------------------------------------------------------------------------------------------------------------------------------------------------------------------------------------------------------------------------------------------------------------------------------------------------------------------------------------------------------------------------------------------|
| <b>Title and abstract</b>    | 1       | (a) Indicate the study's design with a commonly used term in the title or the abstract<br>(b) Provide in the abstract an informative and balanced summary of what was done and what was found                                                                                                                                                                                                                                                                                                                                                                                                                                                                                                    |
| <b>Introduction</b>          |         |                                                                                                                                                                                                                                                                                                                                                                                                                                                                                                                                                                                                                                                                                                  |
| Background/rationale         | 2       | Explain the scientific background and rationale for the investigation being reported                                                                                                                                                                                                                                                                                                                                                                                                                                                                                                                                                                                                             |
| Objectives                   | 3       | State specific objectives, including any prespecified hypotheses                                                                                                                                                                                                                                                                                                                                                                                                                                                                                                                                                                                                                                 |
| <b>Methods</b>               |         |                                                                                                                                                                                                                                                                                                                                                                                                                                                                                                                                                                                                                                                                                                  |
| Study design                 | 4       | Present key elements of study design early in the paper                                                                                                                                                                                                                                                                                                                                                                                                                                                                                                                                                                                                                                          |
| Setting                      | 5       | Describe the setting, locations, and relevant dates, including periods of recruitment, exposure, follow-up, and data collection                                                                                                                                                                                                                                                                                                                                                                                                                                                                                                                                                                  |
| Participants                 | 6       | (a) <i>Cohort study</i> —Give the eligibility criteria, and the sources and methods of selection of participants. Describe methods of follow-up<br><i>Case-control study</i> —Give the eligibility criteria, and the sources and methods of case ascertainment and control selection. Give the rationale for the choice of cases and controls<br><i>Cross-sectional study</i> —Give the eligibility criteria, and the sources and methods of selection of participants<br>(b) <i>Cohort study</i> —For matched studies, give matching criteria and number of exposed and unexposed<br><i>Case-control study</i> —For matched studies, give matching criteria and the number of controls per case |
| Variables                    | 7       | Clearly define all outcomes, exposures, predictors, potential confounders, and effect modifiers. Give diagnostic criteria, if applicable                                                                                                                                                                                                                                                                                                                                                                                                                                                                                                                                                         |
| Data sources/<br>measurement | 8*      | For each variable of interest, give sources of data and details of methods of assessment (measurement). Describe comparability of assessment methods if there is more than one group                                                                                                                                                                                                                                                                                                                                                                                                                                                                                                             |
| Bias                         | 9       | Describe any efforts to address potential sources of bias                                                                                                                                                                                                                                                                                                                                                                                                                                                                                                                                                                                                                                        |
| Study size                   | 10      | Explain how the study size was arrived at                                                                                                                                                                                                                                                                                                                                                                                                                                                                                                                                                                                                                                                        |
| Quantitative variables       | 11      | Explain how quantitative variables were handled in the analyses. If applicable, describe which groupings were chosen and why                                                                                                                                                                                                                                                                                                                                                                                                                                                                                                                                                                     |
| Statistical methods          | 12      | (a) Describe all statistical methods, including those used to control for confounding<br>(b) Describe any methods used to examine subgroups and interactions<br>(c) Explain how missing data were addressed<br>(d) <i>Cohort study</i> —If applicable, explain how loss to follow-up was addressed<br><i>Case-control study</i> —If applicable, explain how matching of cases and controls was addressed<br><i>Cross-sectional study</i> —If applicable, describe analytical methods taking account of sampling strategy<br>(e) Describe any sensitivity analyses                                                                                                                                |

Continued on next page

**Results**

|                  |     |                                                                                                                                                                                                                                                                                                                                                                                                               |
|------------------|-----|---------------------------------------------------------------------------------------------------------------------------------------------------------------------------------------------------------------------------------------------------------------------------------------------------------------------------------------------------------------------------------------------------------------|
| Participants     | 13* | (a) Report numbers of individuals at each stage of study—eg numbers potentially eligible, examined for eligibility, confirmed eligible, included in the study, completing follow-up, and analysed<br>(b) Give reasons for non-participation at each stage<br>(c) Consider use of a flow diagram                                                                                                               |
| Descriptive data | 14* | (a) Give characteristics of study participants (eg demographic, clinical, social) and information on exposures and potential confounders<br>(b) Indicate number of participants with missing data for each variable of interest<br>(c) <i>Cohort study</i> —Summarise follow-up time (eg, average and total amount)                                                                                           |
| Outcome data     | 15* | <i>Cohort study</i> —Report numbers of outcome events or summary measures over time<br><i>Case-control study</i> —Report numbers in each exposure category, or summary measures of exposure<br><i>Cross-sectional study</i> —Report numbers of outcome events or summary measures                                                                                                                             |
| Main results     | 16  | (a) Give unadjusted estimates and, if applicable, confounder-adjusted estimates and their precision (eg, 95% confidence interval). Make clear which confounders were adjusted for and why they were included<br>(b) Report category boundaries when continuous variables were categorized<br>(c) If relevant, consider translating estimates of relative risk into absolute risk for a meaningful time period |
| Other analyses   | 17  | Report other analyses done—eg analyses of subgroups and interactions, and sensitivity analyses                                                                                                                                                                                                                                                                                                                |

**Discussion**

|                  |    |                                                                                                                                                                            |
|------------------|----|----------------------------------------------------------------------------------------------------------------------------------------------------------------------------|
| Key results      | 18 | Summarise key results with reference to study objectives                                                                                                                   |
| Limitations      | 19 | Discuss limitations of the study, taking into account sources of potential bias or imprecision. Discuss both direction and magnitude of any potential bias                 |
| Interpretation   | 20 | Give a cautious overall interpretation of results considering objectives, limitations, multiplicity of analyses, results from similar studies, and other relevant evidence |
| Generalisability | 21 | Discuss the generalisability (external validity) of the study results                                                                                                      |

**Other information**

|         |    |                                                                                                                                                               |
|---------|----|---------------------------------------------------------------------------------------------------------------------------------------------------------------|
| Funding | 22 | Give the source of funding and the role of the funders for the present study and, if applicable, for the original study on which the present article is based |
|---------|----|---------------------------------------------------------------------------------------------------------------------------------------------------------------|

\*Give information separately for cases and controls in case-control studies and, if applicable, for exposed and unexposed groups in cohort and cross-sectional studies.

**Note:** An Explanation and Elaboration article discusses each checklist item and gives methodological background and published examples of transparent reporting. The STROBE checklist is best used in conjunction with this article (freely available on the Web sites of PLoS Medicine at <http://www.plosmedicine.org/>, Annals of Internal Medicine at <http://www.annals.org/>, and Epidemiology at <http://www.epidem.com/>). Information on the STROBE Initiative is available at [www.strobe-statement.org](http://www.strobe-statement.org).



**Contributorship statement**

Arve Lie and Marit Skogstad have written the first draft of manuscript. Bo Engdahl and Kristian Tambs have given valuable advice on the manuscript and statistics. Torstein Seip Johnsen has provided the data from the OHS and has also been involved in the forming of the manuscript.

All the authors have given substantial contributions to conception and design, acquisition of data, analysis and interpretation of data, drafting and revising of the article and final approval of the version to be published.

For peer review only

# BMJ Open

## A cross-sectional study of hearing thresholds among 4627 Norwegian train and track maintenance workers

|                                 |                                                                                                                                                                                                                                                                                                                                                                                                                                                                                            |
|---------------------------------|--------------------------------------------------------------------------------------------------------------------------------------------------------------------------------------------------------------------------------------------------------------------------------------------------------------------------------------------------------------------------------------------------------------------------------------------------------------------------------------------|
| Journal:                        | <i>BMJ Open</i>                                                                                                                                                                                                                                                                                                                                                                                                                                                                            |
| Manuscript ID:                  | bmjopen-2014-005529.R1                                                                                                                                                                                                                                                                                                                                                                                                                                                                     |
| Article Type:                   | Research                                                                                                                                                                                                                                                                                                                                                                                                                                                                                   |
| Date Submitted by the Author:   | 31-Jul-2014                                                                                                                                                                                                                                                                                                                                                                                                                                                                                |
| Complete List of Authors:       | Lie, Arve; STAMI, Occ med & epidemiology; Norwegian State Railways (NSB) Occupational Health Service, Oslo, Norway, Skogstad, Marit; National Institute of Occupational Health, Occupational Medicine and Epidemiology<br>Johnsen, Torstein; Norwegian State Railways (NSB) Occupational Health Service, Oslo, Norway,<br>Engdahl, Bo; Norwegian Institute of Public Health, Division of Mental Health<br>Tambs, Kristian; Norwegian Institute of Public Health, Division of Mental Health |
| <b>Primary Subject Heading</b>: | Occupational and environmental medicine                                                                                                                                                                                                                                                                                                                                                                                                                                                    |
| Secondary Subject Heading:      | Occupational and environmental medicine, Epidemiology                                                                                                                                                                                                                                                                                                                                                                                                                                      |
| Keywords:                       | PREVENTIVE MEDICINE, EPIDEMIOLOGY, OCCUPATIONAL & INDUSTRIAL MEDICINE, Audiology < OTOLARYNGOLOGY                                                                                                                                                                                                                                                                                                                                                                                          |
|                                 |                                                                                                                                                                                                                                                                                                                                                                                                                                                                                            |

SCHOLARONE™  
Manuscripts

only

1  
2  
3  
4  
5  
6  
7 **A cross-sectional study of hearing thresholds among 4627 Norwegian train and track**  
8 **maintenance workers**  
9

10 Arve Lie, MD<sup>12</sup>

11 Marit Skogstad, PhD<sup>1</sup>

12 Torstein Seip Johnsen, MD<sup>2</sup>

13 Bo Engdahl, PhD<sup>3</sup>

14 Kristian Tambs, PhD<sup>3</sup>

15  
16  
17  
18  
19  
20  
21 <sup>1</sup>: Department of Occupational Medicine and Epidemiology,

22 National Institute of Occupational Health, Oslo, Norway

23  
24 <sup>2</sup>: Norwegian State Railways (NSB) Occupational Health Service, Oslo, Norway

25  
26  
27 <sup>3</sup>: Norwegian Institute of Public Health, Oslo, Norway  
28  
29

30  
31 **Running title:**

32 Hearing thresholds among railway maintenance workers

33  
34 Corresponding author: Arve Lie, National Institute of Occupational Health, P.O. Box 8149

35  
36 Dep., N-0033 Oslo, Norway. Telephone: +4723195396, Fax : +4723195202,

37  
38 e-mail address: arve.lie@stami.no  
39

40  
41 **Word count article core:** 2270.

42  
43 **Word count abstract:** 232.

44  
45 **Number of figures and tables:** 4.

46  
47 **Number of references:** 19.  
48  
49  
50  
51  
52  
53  
54  
55  
56  
57  
58  
59  
60

## Abstract

### Objective

Railway workers performing maintenance work of trains and tracks could be at risk of developing noise induced hearing loss, since they are exposed to noise levels of 75- 90 dB(A) with peak exposures of 130-140 dB(C). The objective was to make a risk assessment by comparing the hearing thresholds among train and track maintenance workers with a reference group not exposed to noise and reference values from the ISO 1999.

### Design

Cross sectional

### Setting

A major Norwegian railway company.

### Participants

1897 male train and 2730 male track maintenance workers, all exposed to noise, and 2872 male railway traffic controllers and office workers not exposed to noise.

### Outcome measures

The primary outcome was the hearing threshold (pure tone audiometry, frequencies from 0.5 to 8 kHz) and the secondary the prevalence of audiometric notches (Coles notch) of the most recent audiogram.

### Results

The train and track maintenance workers 45 years or older had a small mean hearing loss in the 3-6 kHz area of 3-5 dB. The hearing loss was smaller among workers younger than 45 years. Audiometric notches were slightly more prevalent among the noise exposed (59-64%) compared to the controls (49%).

### Conclusion

Train and track maintenance workers 45 years or older on average have a slightly greater hearing loss and more audiometric notches compared to reference groups not exposed to noise. Younger (<45 years) workers have hearing thresholds comparable to the controls.

1  
2  
3  
4  
5  
6  
7  
8  
9  
10  
11  
12  
13  
14  
15  
16  
17  
18  
19  
20  
21  
22  
23  
24  
25  
26  
27  
28  
29  
30  
31  
32  
33  
34  
35  
36  
37  
38  
39  
40  
41  
42  
43  
44  
45  
46  
47  
48  
49  
50  
51  
52  
53  
54  
55  
56  
57  
58  
59  
60

**Strengths and limitations of the study**

Strengths:

- The size of the study with close to 100% participation rate
- The use of two groups for comparison
- High quality of the audiometric data and exposure assessment

Limitations:

- Cross sectional study with only the most recent audiogram from the participants

For peer review only

## Introduction

Noise induced hearing loss (NIHL) accounts for more than 60 percents of occupational disorders reported to the Norwegian Labor Inspection Authority<sup>1</sup>. Age is, however, the main cause for hearing loss<sup>2</sup>. Heritability, gender, smoking, high blood pressure, diabetes, high cholesterol level, the use of ototoxic medication and exposure to ototoxic chemicals may also affect the hearing and so may leisure time noise, first and foremost from the use of firearms<sup>3-5</sup>.

Train and track maintenance workers are occupationally exposed to noise. Noise measurements in the railway companies that we have studied reveal average 8 hour noise exposure levels of 75-90 dB(A) in both groups with peak exposures reaching 130-140 dB(C).

In studies of train and track maintenance workers, noise induced hearing loss has been described by Virokannas<sup>6</sup>, but the exposure levels were much higher than in our study. In the US National Health Interview Survey, railroad employees had the highest prevalence of hearing difficulties among the occupational groups examined, but the study did not present audiometric data, only self reported symptoms<sup>7</sup>.

Norwegian physicians are legally obliged to report occupational diseases, such as NIHL, to the Norwegian Labour Inspection Authority. More than 70 percents of the male 20-64 year old workers that we have studied, have an audiogram meeting the national criteria for NIHL, namely a sufficiently strong noise exposure and a hearing loss of 25 dB or more at either 3, 4 or 6 kHz, worse ear, or 20 dB for all of 3, 4 and 6 kHz, worse ear, not adjusted for age or sex<sup>8</sup>.

A recent study of hearing status among train drivers and train conductors in the Norwegian State Railways showed normal mean hearing threshold for their age<sup>9</sup>. Still many of them, just like the maintenance workers that we have studied, had audiograms compatible with the Norwegian criteria for NIHL.

The aim of this cross-sectional study was to assess the risk of noise induced hearing loss among train and track maintenance workers by comparing their audiograms with audiograms from a reference group of railway workers not exposed to noise and a Norwegian reference population (HUNT)<sup>10</sup> which recently has been included in the 2013 revision of the ISO 1999 reference data base<sup>11</sup>.

## Methods

### *Exposure assessment*

As a part of the risk assessment of the train and track maintenance workers, the occupational hygienists of the occupational health service (OHS) have conducted an extensive programme of measurements of the noise exposure by dosimetry and peak noise measurements. The exposure shows high variability, depending on the type of work being done. On an 8 hour average level the exposure varies from 75 dB(A) up to 90 dB(A), averaging 85-86 dB(A), and with peak exposures up to 130 dB(C) - 140 dB(C). Since the workers should wear hearing protection when the exposure exceeds 85 dB(A), the actual exposure to the ear will become somewhat lower.

### *The study group*

1  
2  
3 Most of the train and track maintenance workers have to perform an audiometric test as a part of a  
4 mandatory health assessment due to national and European Union regulations for railway safety  
5 personnel in order to be certified. The test is to be done before employment and later, depending on  
6 age, with 1-5 year intervals. All the tests are conducted by the occupational health service (OHS) of  
7 the Norwegian state railways (NSB).  
8

9  
10 The most recent available audiograms of the participating subjects, recorded during the period 1994-  
11 2011, were obtained from the electronic medical records along with age, sex and type of job  
12 information. Since there were only a few female maintenance workers, only male workers were  
13 used in the analysis.  
14

15 Audiograms from the train and track maintenance workers were compared with those of a control  
16 group of non-exposed male railway office workers, mainly doing traffic controlling, and with a similar  
17 social and educational background and salary as the maintenance workers. The study population was  
18 also compared with external reference data from the ISO 1999: 2013, annex B, table 2, based on a  
19 Norwegian reference population<sup>11</sup>.  
20  
21

### 22 *Hearing examination*

23  
24 Madsen Xeta Otometrics pure tone audiometric testing using a TDH-39P earphone headset in a  
25 soundproof booth at frequencies of 0.25, 0.5, 1, 2, 3, 4, 6 and 8 kHz was performed by trained  
26 nurses. The audiometric test was done in line with standard procedures according to the Norwegian  
27 Labour Inspection Authority<sup>8</sup>. The audiometer was calibrated every second year according to the  
28 requirements of the equipment provider.  
29  
30

31 Since grouped median and percentile values from the better ear are used in the ISO 1990: 2013, the  
32 same values of the hearing threshold of frequencies from 0.5- 8 kHz were computed and compared  
33 to the values from reference groups.  
34  
35

36 The prevalence of notches was calculated since audiometric notches are regarded as an indicator of  
37 NIHL<sup>12</sup>. The Coles notch was used. It is defined as hearing thresholds at 3, 4 or 6 kHz of 10 dB or more  
38 compared to that at 1 or 2 kHz and 8 kHz<sup>13</sup>. The criteria established by Coles et al. have been proven  
39 to correlate well with clinical assessments<sup>14</sup>  
40  
41

42 Finally, the prevalence of hearing loss meeting the Norwegian NIHL criteria, a hearing loss of 25 dB or  
43 more at either 3, 4 or 6 kHz or 20 dB for all of 3, 4 and 6 kHz, worse ear, was computed and  
44 compared to the reference group.  
45

### 46 *Ethical considerations*

47  
48 The audiograms have been obtained as a part of regular occupational health services work. Risk  
49 assessment of NIHL is a part of the OHS tasks. Therefore an application to the regional ethical  
50 committee is not necessary according to Norwegian regulations.  
51  
52

### 53 *Statistics*

54  
55 Descriptive statistics were used in this study. Groups were compared using chi-square tests for  
56 categorical variables and ANOVA for continuous variables. The data analysis was performed using  
57  
58  
59  
60

SPSS (IBM SPSS Statistics Version 20) with percentile values estimated by the FREQUENCIES /GROUPED command<sup>15</sup>. A significance level of 5% was chosen.

### Competing interests

None declared. The study did not receive any funding.

### Results

Audiograms from 1897 train- and 2730 track maintenance workers, all males, were compared to audiograms from 2872 male railway office workers working as traffic controllers or in other types of jobs without any significant noise exposure.

An overview of age distribution in the train- and track maintenance workers and non-exposed office workers is shown in table 1.

Table 1: Background data and noise exposure in male train and track maintenance workers compared to an internal male non noise exposed reference group.

|                                     | Age   | Train maintenance | Track maintenance | Internal ref. | P                   |
|-------------------------------------|-------|-------------------|-------------------|---------------|---------------------|
| Age, mean (SD)                      |       | 47.6 (11.9)       | 46.2 (13.0)       | 45.7 (11.8)   | <0.001 <sup>a</sup> |
| Age, N=                             | -24   | 118               | 286               | 129           |                     |
|                                     | 25-34 | 225               | 275               | 504           |                     |
|                                     | 35-44 | 330               | 529               | 692           |                     |
|                                     | 45-54 | 555               | 801               | 738           |                     |
|                                     | 55-64 | 669               | 839               | 809           |                     |
|                                     | Total | 1897              | 2730              | 2872          |                     |
| Occupational noise exposure (dB(A)) |       | 75-90 + peak      | 75-90 + peak      | < 70          |                     |

<sup>a</sup>) ANOVA

The average age and the distribution of age were similar in the 3 groups. The noise exposure of the train and track maintenance workers is in the order of 75-90 dB(A). In addition there may be peak exposures of 130-140 dB(C). Hearing protection in terms of ear muffs or ear plugs is to be used when the noise exposure exceeds 80 dB(A).

Figure 1 shows the grouped median values of the hearing thresholds of the maintenance workers, the internal control group and the ISO 1999. The largest difference between the noise exposed and the control groups, 2-7 dB for 3 kHz and 4 kHz, was found for the age groups 45 years or older compared with the control groups. The grouped 90 percentile (figure 2) of the hearing thresholds reveals similar findings with an elevated hearing threshold of 6-10 dB in the same age groups of the noise exposed workers compared to the control groups. In the younger age groups (25-44 years) there are only minor differences between those with noise exposure compared to the internal control group and ISO-standards.

The hearing loss, the prevalences of audiometric notches and NIHL criteria in the maintenance workers compared with the internal control group are shown in table 2.



Table 2: Hearing loss (better ear) and prevalence of audiometric notches (worse ear) and NIHL (worse ear) in male train and track maintenance workers compared to an internal male non noise exposed reference group.

|                                                                                          | Age   | Train maintenance | Track maintenance          | Internal ref. | P                   |
|------------------------------------------------------------------------------------------|-------|-------------------|----------------------------|---------------|---------------------|
| Hearing loss compared to the internal reference, mean 3,4 and 6 kHz, better ear (95% CI) |       |                   |                            |               |                     |
|                                                                                          | -24   | 2.3(0.8-3.7)      | 1.1(-0.1-2.3) <sup>b</sup> | 0 (Ref)       |                     |
|                                                                                          | 25-34 | 0.8(-0.5-2.1)     | 0.0(-1.2-1.3)              | 0 (Ref)       |                     |
|                                                                                          | 35-44 | 1.8(0.3-3.3)      | 1.1(-0.2-2.4)              | 0 (Ref)       |                     |
|                                                                                          | 45-54 | 3.3(1.6-5.0)      | 3.1(1.5-4.6)               | 0 (Ref)       |                     |
|                                                                                          | 55-64 | 4.6(2.5-6.6)      | 4.9(2.9-6.8)               | 0 (Ref)       |                     |
| Coles audiometric notch, prevalence, worse ear (%)                                       |       |                   |                            |               |                     |
|                                                                                          | -24   | 50                | 56                         | 39            | <0.001 <sup>c</sup> |
|                                                                                          | 25-34 | 50                | 53                         | 39            | <0.001              |
|                                                                                          | 35-44 | 59                | 62                         | 50            | <0.001              |
|                                                                                          | 45-54 | 65                | 71                         | 55            | <0.001              |
|                                                                                          | 55-64 | 60                | 66                         | 52            | <0.001              |
|                                                                                          | Total | 59                | 64                         | 49            | <0.001              |
| NIHL criteria hearing loss, prevalence, worse ear, (%)                                   |       |                   |                            |               |                     |
|                                                                                          | -24   | 26                | 21                         | 20            | 0.432 <sup>a</sup>  |
|                                                                                          | 25-34 | 36                | 29                         | 28            | 0.116               |
|                                                                                          | 35-44 | 63                | 56                         | 50            | <0.001              |
|                                                                                          | 45-54 | 87                | 85                         | 74            | <0.001              |
|                                                                                          | 55-64 | 95                | 95                         | 92            | 0.005               |
|                                                                                          | Total | 76                | 70                         | 63            | <0.001              |

<sup>a</sup>) ANOVA <sup>b</sup>) ANOVA, Bonferroni post hoc <sup>c</sup>) Chi- square test

From the age of 45 there is a significant hearing loss among the maintenance workers of 3-5 dB compared to the controls. In the younger age groups the hearing is comparable to that of the controls group.

An increase in audiometric notches in all groups with increasing age up to the age of 54 and then declining, is revealed with a significant higher prevalences in the exposed groups compared with the control group for all age groups.

The prevalence of the Norwegian criteria for NIHL is in line with the audiometric notches found in the present study (table 2). The prevalence of audiometric NIHL criteria is almost as high in the reference group (63%) as in the train- and track maintenance workers (70-76%).

The results indicate that there is only a small, but significant noise induced hearing loss in the noise sensitive area (3-6 kHz) in the exposed workers from the age of 35.

## Discussion

1  
2  
3 This cross-sectional study of 4627 male train- and track maintenance workers demonstrates hearing  
4 thresholds similar to that of the non-exposed groups, but the oldest workers have a small, but  
5 significantly greater hearing loss with more notched audiograms than the control group. This  
6 indicates a small noise induced hearing loss (NIHL) in the noise exposed groups. The magnitude of  
7 the hearing loss of the noise sensitive area (3-6 kHz) is in the order of 5 dB or less, which is about as  
8 expected. According to ISO 1999<sup>11</sup> an unprotected noise exposure of 85 and 90 dB(A) at an 8 hour  
9 daily basis will lead to a median expected hearing loss of 4 dB and 9 dB, respectively, after 10 years of  
10 exposure.  
11

12  
13 The hearing of the younger workers is close to normal. This is probably due to shorter time of noise  
14 exposure, better preventive measures, such as the use of noise protection and the use of hearing  
15 protection, during the last years and in line with studies of similar noise-exposed groups in the  
16 developed world<sup>16-18</sup>. The workers 45 years or older, however, had a small noise-induced hearing  
17 loss. This could be due to a longer time of noise exposure and former high levels of workplace noise.  
18 This finding is also in line with previous studies showing that railroad workers are at risk of getting  
19 NIHL<sup>6,7</sup>.  
20

21  
22 The strengths of the present study include a large number of maintenance workers and large control  
23 groups. We also assess the audiometric measurements to be of good quality. Since audiometric  
24 testing is mandatory for most of the workers, we assume that the participation rate is close to 100 %.  
25 The use of two comparison groups strengthens the study. The results from the two comparison  
26 groups are very similar. Furthermore, the internal control group of office workers was examined by  
27 the same OHS professionals and with the same audiometric equipment as were the train and track  
28 maintenance workers.  
29

30  
31 There are, however, also some limitations of this study.  
32

33  
34 This cross sectional assessment is based on only one audiogram from each of the participants, the  
35 most recent measurement. Longitudinal data would be favorable in such a study, because selective  
36 drop-out may have occurred. Since selection in and selection out of work due to hearing loss is quite  
37 uncommon, we believe that the limitation of using cross-sectional data in this study is of minor  
38 importance.  
39

40  
41 Information of factors other than noise that may modify hearing loss such as smoking, high blood  
42 pressure, metabolic syndrome, diabetes, exposure to ototoxic medication or chemicals, leisure time  
43 noise exposure etc were not available. Thus possible confounders were not assessed. The  
44 maintenance workers have probably been more exposed to chemicals than the reference groups. For  
45 the other factors we have no reason to believe that they would influence the results since we doubt  
46 that they have a different prevalence among the workers compared with the controls.  
47

48  
49 Most of the maintenance workers went through a health examination before they were employed,  
50 and a severe hearing loss would normally have been regarded as a disqualification preventing  
51 employment. One may therefore expect some selection at recruitment. The requirements regarding  
52 hearing acuity are not very strict, however, and identical for the maintenance workers and the  
53 control group of railway workers. We therefore believe that selection factors are of minor  
54 importance.  
55  
56  
57  
58  
59  
60

1  
2  
3 We are lacking information of years of employment for the maintenance workers and even for the  
4 office workers. Most of the train- and track maintenance workers, however, are recruited at an early  
5 age and are quite stable with only a small turnover. The same is the case for the office personnel.  
6 We cannot rule out the possibility that these groups have had a previous job with occupational noise  
7 exposure, but we assess the possibility for this to influence the results to be unlikely.  
8  
9

10 Before we conducted this study, there was a general perception that train and track maintenance  
11 workers are at risk for getting noise induced hearing loss. Based on individual assessments of workers  
12 and their audiograms and using the diagnostic guidelines of the Norwegian Labor Inspection  
13 Authority, 70 to 76 percent were suspected to have NIHL. The prevalence according to these criteria  
14 was 63 percent in the internal control group with office workers. This indicates that the use of these  
15 criteria has strong limitations with respect to the validity of predicting noise induced hearing loss.  
16  
17

18 To distinguish between noise induced and age related hearing loss based solely on audiograms is  
19 problematic. Some indications of differences may be given by audiometric notches, but they are also  
20 present in workers without any noise exposure as shown in the present and other studies<sup>19 20</sup>.  
21  
22

23 The results might be valid for male railway maintenance workers in other countries with similar type  
24 of work, noise exposure and legislation.  
25

26 In conclusion, this cross-sectional study has detected a small average hearing loss among the older  
27 part of the 4627 male train and track maintenance workers compared with non-exposed workers in  
28 the same company and reference values from ISO 1999: 2013.  
29  
30

### 31 32 33 34 35 **Figure legends**

36  
37 Figure 1: Hearing threshold of male train and track maintenance workers compared to ISO 1999:2013  
38 and an internal reference group of office workers. 50 percentile.  
39

40 Figure 2: Hearing threshold of male train and track maintenance workers compared to ISO 1999:2013  
41 and an internal reference group of office workers. 90 percentile.  
42  
43  
44  
45  
46

#### 47 **What this paper adds:**

- 48 • Previous studies have suggested that railway maintenance workers are at risk for the development of noise induced hearing loss (NIHL).
- 49 • This study has detected only small hearing loss among older maintenance workers compared to reference values.
- 50 • Hearing loss meeting national criteria for NIHL and audiometric notches are highly prevalent among workers not exposed to noise and are therefore of limited use in the diagnosis of NIHL.  
51  
52  
53  
54  
55  
56  
57  
58  
59  
60

1  
2  
3  
4  
5  
6  
7  
8  
9  
10  
11  
12  
13  
14  
15  
16  
17  
18  
19  
20  
21  
22  
23  
24  
25  
26  
27  
28  
29  
30  
31  
32  
33  
34  
35  
36  
37  
38  
39  
40  
41  
42  
43  
44  
45  
46  
47  
48  
49  
50  
51  
52  
53  
54  
55  
56  
57  
58  
59  
60

For peer review only

**Acknowledgement**

Per Frode Hove, Ingvill M. Hornkjøl and the rest of the staff at the Norwegian State Railways (NSB) Occupational Health Service are greatly acknowledged for providing exposure data, data from the medical records, and for valuable criticism and advice

**Contributorship statement**

Arve Lie and Marit Skogstad have written the first draft of manuscript. Bo Engdahl and Kristian Tambs have given valuable advice on the manuscript and statistics. Torstein Seip Johnsen has provided the data from the OHS and has also been involved in the forming of the manuscript.

All the authors have given substantial contributions to conception and design, acquisition of data, analysis and interpretation of data, drafting and revising of the article and final approval of the version to be published.

**Competing Interests**

There are no competing interests

**Data Sharing Statement**

No additional data are available

## References

1. Samant Y, Parker D, Wergeland E, et al. The Norwegian Labour Inspectorate's Registry for Work-Related Diseases: data from 2006. *Int J Occup Environ Health* 2008;**14**(4):272-79.
2. Cruickshanks KJ, Wiley TL, Tweed TS, et al. Prevalence of hearing loss in older adults in Beaver Dam, Wisconsin. The Epidemiology of Hearing Loss Study. *AmJ Epidemiol* 1998;**148**(9):879-86.
3. Le Prell CG, Henderson D. Perspectives on Noise-Induced Hearing Loss. In: Le Prell CG, Henderson D, Fay RR, et al., eds. *Noise induced hearing loss*: Springer New York, 2012:1-10.
4. Kvestad E, Czajkowski N, Krog NH, et al. Heritability of hearing loss. *Epidemiology* 2012;**23**(2).
5. Tambs K, Hoffman HJ, Borchgrevink HM, et al. Hearing loss induced by noise, ear infections, and head injuries: results from the Nord-Trondelag Hearing Loss Study. *IntJ Audiol* 2003;**42**(2):89-105.
6. Virokannas H, Anttonen H, Niskanen J. Health risk assessment of noise, hand-arm vibration and cold in railway track maintenance. *International Journal of Industrial Ergonomics* 1994;**13**(3).
7. Tak S, Calvert GM. Hearing difficulty attributable to employment by industry and occupation: an analysis of the National Health Interview Survey--United States, 1997 to 2003. *J Occup Environ Med* 2008;**50**(1):46-56.
8. The Norwegian Labour Inspection Authority. *Audiometric testing in noise exposed workers (in Norwegian)*, 2013.
9. Lie A, Skogstad M, Johnsen TS, et al. Hearing status among Norwegian train drivers and train conductors. *Occup Med (Lond)* 2013;**63**(8):544-48.
10. Engdahl B, Tambs K, Borchgrevink HM, et al. Screened and unscreened hearing threshold levels for the adult population: results from the Nord-Trondelag Hearing Loss Study. *Int J Audiol* 2005;**44**(4).
11. International Organization for S. ISO 1999. *Acoustics - Estimation of noise-induced hearing loss. International Standard 2013*;1999: 2013 (E)(1).
12. McBride D, Williams S. Characteristics of the audiometric notch as a clinical sign of noise exposure. *Scand Audiol* 2001;**30**(2):106-11.
13. Coles RR, Lutman ME, Buffin JT. Guidelines on the diagnosis of noise-induced hearing loss for medicolegal purposes. *ClinOtolaryngolAllied Sci* 2000;**25**(4):264-73.
14. Rabinowitz PM, Galusha D, Slade MD, et al. Audiogram notches in noise-exposed workers. *Ear and Hearing* 2006;**27**(6):742-50.
15. Hyndman RJ, Fan Y. Sample quantiles in statistical packages. *The American Statistician* 1996;**50**(4):361-65.
16. Rubak T, Kock SA, Koefoed-Nielsen B, et al. The risk of noise-induced hearing loss in the Danish workforce. *Noise Health* 2006;**8**(31):80-87.
17. Bruehl P, Ivarsson A, Toremalm NG. Noise-induced hearing loss in an automobile sheet-metal pressing plant. *Scandinavian Audiology* 1994;**23**(2).
18. Engdahl B, Tambs K. Occupation and the risk of hearing impairment - results from the Nord-Trondelag study on hearing loss. *Scandinavian Journal of Work Environment & Health* 2010;**36**(3).
19. Nondahl DM, Shi X, Cruickshanks KJ, et al. Notched audiograms and noise exposure history in older adults. *Ear Hear* 2009;**30**(6):696-703.
20. Osei-Lah V, Yeoh LH. High frequency audiometric notch: An outpatient clinic survey. *Int J Audiol* 2010;**49**(2).

1  
2  
3  
4  
5  
6  
7  
8  
9  
10  
11  
12  
13  
14  
15  
16  
17  
18  
19  
20  
21  
22  
23  
24  
25  
26  
27  
28  
29  
30  
31  
32  
33  
34  
35  
36  
37  
38  
39  
40  
41  
42  
43  
44  
45  
46  
47  
48  
49  
50  
51  
52  
53  
54  
55  
56  
57  
58  
59  
60

**A cross-sectional study of hearing thresholds among 4627 Norwegian train and track maintenance workers**

Arve Lie, MD<sup>12</sup>

Marit Skogstad, PhD<sup>1</sup>

Torstein Seip Johnsen, MD<sup>2</sup>

Bo Engdahl, PhD<sup>3</sup>

Kristian Tambs, PhD<sup>3</sup>

<sup>1</sup>: Department of Occupational Medicine and Epidemiology,

National Institute of Occupational Health, Oslo, Norway

<sup>2</sup>: Norwegian State Railways (NSB) Occupational Health Service, Oslo, Norway

<sup>3</sup>: Norwegian Institute of Public Health, Oslo, Norway

**Running title:**

Hearing thresholds among railway maintenance workers

Corresponding author: Arve Lie, National Institute of Occupational Health, P.O. Box 8149

Dep., N-0033 Oslo, Norway. Telephone: +4723195396, Fax : +4723195202,

e-mail address: arve.lie@stami.no

**Word count article core:** 2225.

**Word count abstract:** 250.

**Number of figures and tables:** 4.

**Number of references:** 19.

## Abstract

### Background

Railway workers performing maintenance work of trains and tracks could be at an increased risk of developing noise induced hearing loss, since they are exposed to noise levels of 75- 90 dB(A) with peak exposures of 130-140 dB(C).

### Objective

To study hearing thresholds among train and track maintenance workers and to compare the results with reference groups not exposed to noise.

### Methods

The most recent audiogram from a total of 1897 male train and 2730 track maintenance workers were obtained from the medical records of the occupational health service of the Norwegian State Railways (NSB), the largest Norwegian railway company. The results were compared with audiograms from a control group of 2872 male railway traffic controllers and office workers not exposed to noise and with reference values from the ISO 1999:2013. The frequencies from 0.5 to 8 kHz of the better ear and the prevalence of audiometric notches ( $\geq 25$  dB (A) at 4 kHz)(Coles notch) were used for comparison.

### Results

The train and track maintenance workers 45 years or older had a small mean hearing loss in the 3-6 kHz area of 3-5 dB. The hearing loss was smaller among workers younger than 45 years, and a higher prevalence of audiometric notches (25% vs. 17%) was slightly more prevalent among the noise exposed (59-64%) compared to the controls (49%). ~~The hearing loss was smaller among workers younger than 45 years.~~

### Conclusion

Train and track maintenance workers 45 years or older on average have a slightly ~~stronger~~ greater hearing loss and more audiometric notches compared to reference groups not exposed to noise. Younger (<45 years) workers have hearing thresholds comparable to the reference groups.



1  
2  
3  
4  
5  
6  
7  
8  
9  
10  
11  
12  
13  
14  
15  
16  
17  
18  
19  
20  
21  
22  
23  
24  
25  
26  
27  
28  
29  
30  
31  
32  
33  
34  
35  
36  
37  
38  
39  
40  
41  
42  
43  
44  
45  
46  
47  
48  
49  
50  
51  
52  
53  
54  
55  
56  
57  
58  
59  
60

**Strengths and limitations of the study**

Strengths:

- The size of the study with close to 100% participation rate
- The use of two groups for comparison
- High quality of the audiometric data and exposure assessment

Limitations:

- Cross sectional study with only the most recent audiogram from the participants

For peer review only

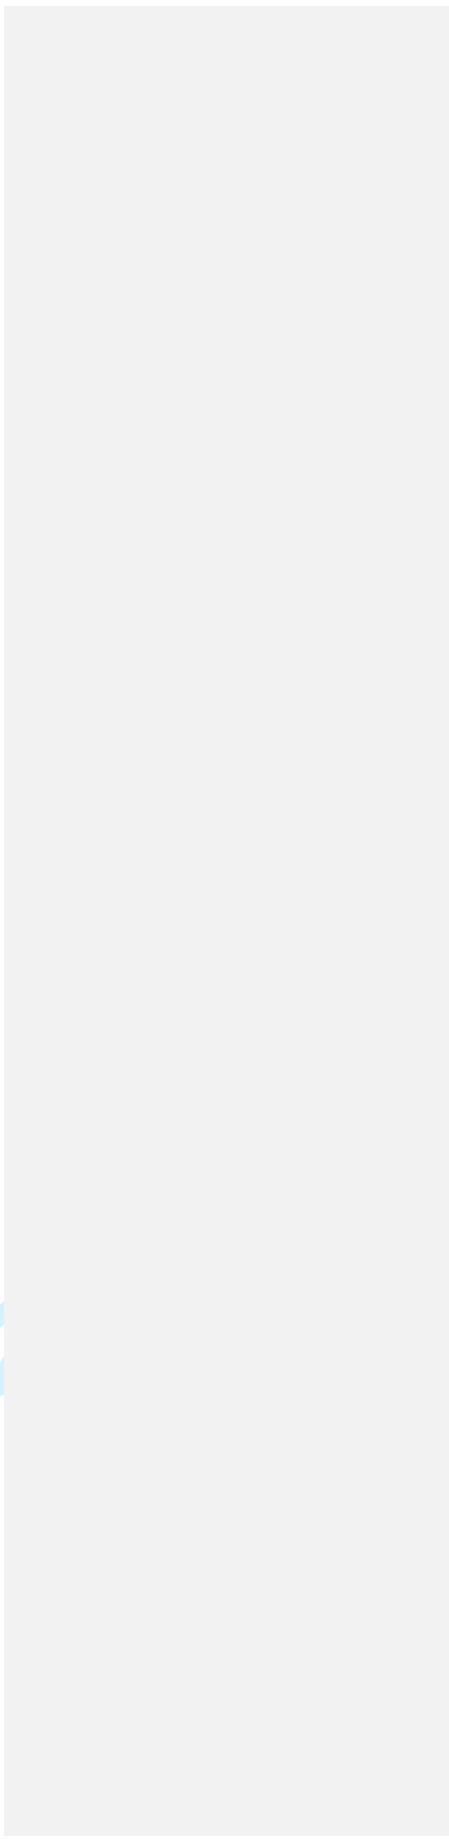

## Introduction

Noise induced hearing loss (NIHL) accounts for more than 60 percents of occupational disorders reported to the Norwegian Labor Inspection Authority<sup>1</sup>. Age is, however, the main cause for hearing loss<sup>2</sup>. Heritability, gender, smoking, high blood pressure, diabetes, high cholesterol level, the use of ototoxic medication and exposure to ototoxic chemicals may **also** affect the hearing and so may leisure time noise, first and foremost from the use of firearms<sup>3-5</sup>.

Field Code Changed

Field Code Changed

Field Code Changed

Train and track maintenance workers are occupationally exposed to noise. Noise measurements in the railway companies that we have studied reveal average 8 hour noise exposure levels of 75-90 dB(A) in both groups with peak exposures reaching 130-140 dB(C).

In studies of train and track maintenance workers, noise induced hearing loss has been described by Virokannas<sup>6</sup>, but the exposure levels were much higher than in our study. In the US National Health Interview Survey, railroad employees had the highest prevalence of hearing difficulties among the occupational groups examined, but the study did not present audiometric data, only self reported symptoms<sup>7</sup>.

Field Code Changed

Norwegian physicians are legally obliged to report occupational diseases, such as NIHL, to the Norwegian Labour Inspection Authority. More than 70 percents of the male 20-64 year old workers that we have studied, have an audiogram meeting the national criteria for NIHL, namely a sufficiently strong noise exposure and a hearing loss of 25 dB or more at either 3, 4 or 6 kHz, **worse ear**, or 20 dB **or more** for **all** of 3, 4 and 6 kHz, worse ear, not adjusted for age or sex<sup>8</sup>.

Field Code Changed

A recent study of hearing status among train drivers and train conductors in the Norwegian State Railways showed normal mean hearing threshold for their age<sup>9</sup>. Still many of them, just like the maintenance workers that we have studied, had audiograms compatible with the Norwegian criteria for NIHL.

Field Code Changed

The aim of this cross-sectional study was to assess the risk of noise induced hearing loss among train and track maintenance workers by comparing their audiograms with audiograms from a reference group of railway workers not exposed to noise and a Norwegian reference population (HUNT)<sup>10</sup> which recently has been included in the 2013 revision of the ISO 1999 reference data base<sup>11</sup>.

Field Code Changed

Field Code Changed

## Methods

### *Exposure assessment*

As a part of the risk assessment of the train and track maintenance workers, the occupational hygienists of the **OH-occupational health service (OHS)** **hasve** conducted an extensive programme of measurements of the noise exposure by dosimetry and peak noise measurements. The exposure shows **a** high variability, depending on the type of work being done. On an 8 hour average level the exposure varies from 75 dB(A) up to 90 dB(A), averaging 85-86 dBA, and with peak exposures up to 130 dB(C) - 140 dB(C). Since the workers should wear hearing protection when the exposure exceeds 85 dB(A), the actual exposure to the ear will become somewhat lower.

### *The study group*

1  
2  
3  
4  
5  
6  
7 Most of the train and track maintenance workers have to perform an audiometric test as a part of a  
8 mandatory health assessment due to national and European Union regulations for railway safety  
9 personnel. In order to be certified, the test is to be done before employment and later, depending on  
10 age, with 1-5 year intervals. All the tests are conducted by the occupational health service (OHS) of  
11 the Norwegian state railways (NSB).

12 The most recent available audiograms of the participating subjects, recorded during the period 1994-  
13 2011, ~~was~~ were obtained from the electronic medical records along with age, sex and type of job  
14 information. Since there were only a few female maintenance workers, only male workers were  
15 used in the analysis.  
16

17 Audiograms from the train and track maintenance workers were compared with those of a control  
18 group of non-exposed male railway office workers, mainly doing traffic controlling, and with a similar  
19 social and educational background and salary as the maintenance workers. The study population was  
20 also compared with external reference data from the ISO 1999: 2013, annex B, table 2, based on a  
21 Norwegian reference population<sup>11</sup>.  
22

Field Code Changed

#### 23 *Auditory-Hearing examination*

24 Madsen Xeta Otometrics pure tone audiometric testing using a TDH-39P earphone headset in a  
25 soundproof booth at frequencies of 0.25, 0.5, 1, 2, 3, 4, 6 and 8 kHz was performed by trained  
26 nurses. The audiometric test was done in line with standard procedures according to the Norwegian  
27 Labour Inspection Authority<sup>8</sup>. The audiometer was calibrated every second year according to the  
28 requirements of the equipment provider.  
29

Field Code Changed

30 Since grouped median and percentile values ~~from the better ear~~ are used in the ISO 1990: 2013, the  
31 same values of the hearing threshold of frequencies from 0.5- 8 kHz ~~from the better ear~~ were  
32 computed and compared to the values from reference groups.  
33

34 The prevalence of notches was calculated since audiometric notches are regarded as an indicator of  
35 NIHL<sup>12</sup>. ~~The Coles notch was used. It is defined as hearing thresholds at 3, 4 or 6 kHz of 10 dB or more  
36 compared to that at 1 or 2 kHz and 8 kHz<sup>13</sup>. The criteria established by Coles et al. have been proven  
37 to correlate well with clinical assessments<sup>14</sup>. A notch regarded as a hearing loss was  $\geq 25$  dB(A) at  
38 4kHz and a difference in hearing loss between 4kHz and 2 and 8 kHz  $\geq 10$  dB(A).~~  
39

Field Code Changed

Field Code Changed

40 Finally, the prevalence of hearing loss meeting the Norwegian NIHL criteria, a hearing loss of 25 dB or  
41 more at either 3, 4 or 6 kHz or 20 dB ~~or more~~ for all of 3, 4 and 6 kHz, worse ear, was computed and  
42 compared to the reference group.  
43

#### 44 *Ethical considerations*

45 The audiograms have been obtained as a part of regular occupational health services work. Risk  
46 assessment of NIHL is a part of the OHS tasks. Therefore an application to the regional ethical  
47 committee is not necessary according to Norwegian regulations.  
48

#### 49 *Statistics*

50 Descriptive statistics were used in this study. Groups were compared using chi-square tests for  
51 categorical variables and ANOVA for continuous variables. The data analysis was performed using  
52

SPSS (IBM SPSS Statistics Version 20) with percentile values estimated by the FREQUENCIES /GROUPED command<sup>15</sup>. A significance level of 5% was chosen.

### Competing interests

None declared. The study did not receive any external funding.

## Results

Audiograms from 1897 train- and 2730 track maintenance workers, all males, were compared to audiograms from 2872 male railway office workers working as traffic controllers or in other types of jobs without any significant noise exposure.

An overview of age distribution in the train- and track maintenance workers and non-exposed office workers is shown in table 1.

Table 1: Background data and noise exposure in male train and track maintenance workers compared to an internal male non noise exposed reference group.

|                                     | Age   | Train maintenance | Track maintenance | Internal ref. | P                   |
|-------------------------------------|-------|-------------------|-------------------|---------------|---------------------|
| Age, mean (SD)                      |       | 47.6 (11.9)       | 46.2 (13.0)       | 45.7 (11.8)   | <0.001 <sup>a</sup> |
| Age, N=                             | -24   | 118               | 286               | 129           |                     |
|                                     | 25-34 | 225               | 275               | 504           |                     |
|                                     | 35-44 | 330               | 529               | 692           |                     |
|                                     | 45-54 | 555               | 801               | 738           |                     |
|                                     | 55-64 | 669               | 839               | 809           |                     |
|                                     | Total | 1897              | 2730              | 2872          |                     |
| Occupational noise exposure (dB(A)) |       | 75-90 + peak      | 75-90 + peak      | < 70          |                     |

<sup>a</sup>) ANOVA

The average age and the distribution of age were similar in the 3 groups. The noise exposure of the train and track maintenance workers is in the order of 75-90 dB(A). In addition there may be peak exposures of 130-140 dB(C). Hearing protection in terms of ear muffs or ear plugs is to be used when the noise exposure exceeds 80 dB(A).

Figure 1 shows the grouped median values of the hearing thresholds of the maintenance workers, the internal control group and the ISO 1999. The largest difference between the noise exposed and the control groups, 2-7 dB for 3 kHz and 4 kHz, was found for the age groups 45 years or older compared with the control groups. The grouped 90 percentile (figure 2) of the hearing thresholds reveals similar findings with an elevated hearing threshold of 6-10 dB in the same age groups of the noise exposed workers compared to the control groups. In the younger age groups (25-44 years) there are only minor differences between those with noise exposure compared to the internal control group and ISO-standards.

The hearing loss, the prevalences of audiometric notches and NIHL criteria in the maintenance workers compared with the internal control group are shown in table 2.

Field Code Changed

Formatted: Font: Italic

Formatted: Font: (Default) Calibri, Not Italic

Formatted: Font: (Default) Calibri

Table 2: Hearing loss (better ear) and prevalence of audiometric notches (worse ear) and NIHL (worse ear) in male train and track maintenance workers compared to an internal male non noise exposed reference group.

|                                                                                                  | Age   | Train maintenance | Track maintenance          | Internal ref. | P                   |
|--------------------------------------------------------------------------------------------------|-------|-------------------|----------------------------|---------------|---------------------|
| Hearing loss <u>compared to the internal reference</u> , mean 3,4 and 6 kHz, better ear (95% CI) |       |                   |                            |               |                     |
|                                                                                                  | -24   | 2.3(0.8-3.7)      | 1.1(-0.1-2.3) <sup>b</sup> | 0 (Ref)       |                     |
|                                                                                                  | 25-34 | 0.8(-0.5-2.1)     | 0.0(-1.2-1.3)              | 0 (Ref)       |                     |
|                                                                                                  | 35-44 | 1.8(0.3-3.3)      | 1.1(-0.2-2.4)              | 0 (Ref)       |                     |
|                                                                                                  | 45-54 | 3.3(1.6-5.0)      | 3.1(1.5-4.6)               | 0 (Ref)       |                     |
|                                                                                                  | 55-64 | 4.6(2.5-6.6)      | 4.9(2.9-6.8)               | 0 (Ref)       |                     |
|                                                                                                  | Total | 4.6(2.5-5.6)      | 3.2(2.2-4.2)               | 0 (Ref)       |                     |
| <u>Coles A</u> audiometric notch, prevalence, worse ear (%)                                      |       |                   |                            |               |                     |
|                                                                                                  | -24   | 350               | 356                        | 339           | <0.001 <sup>a</sup> |
|                                                                                                  | 25-34 | 4050              | 953                        | 739           | <0.001 <sup>a</sup> |
|                                                                                                  | 35-44 | 2459              | 1962                       | 1350          | <0.001 <sup>a</sup> |
|                                                                                                  | 45-54 | 2965              | 3371                       | 2055          | <0.001              |
|                                                                                                  | 55-64 | 3660              | 3566                       | 2252          | <0.001              |
|                                                                                                  | Total | 2559              | 2564                       | 1649          | <0.001              |
| NIHL criteria hearing loss, prevalence, worse ear, (%)                                           |       |                   |                            |               |                     |
|                                                                                                  | -24   | 26                | 21                         | 20            | 0.432 <sup>b</sup>  |
|                                                                                                  | 25-34 | 36                | 29                         | 28            | 0.116               |
|                                                                                                  | 35-44 | 63                | 56                         | 50            | <0.001              |
|                                                                                                  | 45-54 | 87                | 85                         | 74            | <0.001              |
|                                                                                                  | 55-64 | 95                | 95                         | 92            | 0.005               |
|                                                                                                  | Total | 76                | 70                         | 63            | <0.001              |

<sup>a</sup>) ANOVA <sup>b</sup>) ANOVA, Bonferroni post hoc <sup>c</sup>) Chi- square test

From the age of 45 there is a significant hearing loss among the maintenance workers of 3-5 dB compared to the controls. In the younger age groups the hearing is comparable to that of the controls group.

An increase in audiometric notches in all groups with-increasing age up to the age of 54 and then declining is revealed with a significant higher prevalence in the exposed groups compared with the control group from the age of 35 for all age groups. In the younger age groups the hearing and prevalence of notches is comparable to that of the controls group.

The prevalence of the Norwegian criteria for NIHL is in line with the audiometric notches found in the present study (table 2). The prevalence of audiometric NIHL criteria is almost as high in the reference group (64%) as in the train- and track maintenance workers (70-76%).

The results indicate that there is only a small, but significant noise induced hearing loss in the noise sensitive area (3-6 kHz) in the exposed workers from the age of 35.

Formatted: Not Superscript/ Subscript

## Discussion

This cross-sectional study of 4627 male train- and track maintenance workers demonstrates hearing thresholds similar to that of the non-exposed groups, but the oldest workers have a small, but significantly **ly greater** hearing loss with more notched audiograms than the control group. This indicates a small noise induced hearing loss (NIHL) in the noise exposed groups. The magnitude of the hearing loss of the noise sensitive area (3-6 kHz) is in the order of 5 dB or less, which is about as expected. According to ISO 1999<sup>11</sup> an unprotected noise exposure of 85 and 90 dB(A) at an 8 hour daily basis will lead to a median expected hearing loss of 4 dB and 9 dB, respectively, after 10 years of exposure.

Field Code Changed

The hearing of the younger workers is close to normal. This is probably due to **shorter time of noise exposure**, better preventive measures, such as the use of noise protection and the use of hearing protection, during the last years and in line with studies of similar noise-exposed groups in the developed world<sup>16-18</sup>. The workers 45 years or older, however, had a small noise-induced hearing loss. This could be due to **a longer time of noise exposure and** former high levels of workplace noise. This finding is also in line with previous studies showing that railroad workers are at risk of getting NIHL<sup>6,7</sup>.

Field Code Changed

Field Code Changed

Field Code Changed

~~This present study has some strengths~~**The strengths of the present study include-** ~~The a large~~ number of maintenance workers ~~is large~~ and ~~so are the~~**large** control groups. We also assess the audiometric measurements to be of good quality. Since audiometric testing is mandatory for most of the workers, we assume that the participation rate is close to 100%. The use of two comparison groups strengthens the study. The results from the two comparison groups are very similar. Furthermore, the internal control group of office workers was examined by the same OHS professionals and with the same audiometric equipment as were the train and track maintenance workers.

There are, however, also some limitations of this study.

This cross sectional assessment is based on only one audiogram from each of the participants, the most recent measurement. Longitudinal data would be favorable in such a study, because selective drop-out may have occurred. Since selection in and selection out of work due to hearing loss is quite uncommon, we believe that the limitation of using cross-sectional data in this study is of **limited minor** importance.

Information of factors other than noise that may modify hearing loss such as smoking, high blood pressure, metabolic syndrome, diabetes, exposure to ototoxic medication or chemicals, leisure time noise exposure etc were not available. Thus possible confounders were not assessed. The maintenance workers have probably been more exposed to chemicals than the reference groups. For the other factors we have no reason to believe that they would influence the results since we doubt that they have a different prevalence among the workers compared with the controls.

Most of the maintenance workers went through a health examination before they were employed, and a severe hearing loss would normally have been regarded as a disqualification preventing employment. One may therefore expect some selection at recruitment. The requirements regarding hearing acuity are not very strict, however, and identical for the maintenance workers and the control group of railway workers. ~~Selection would be expected to result in superior hearing in the~~

~~maintenance workers compared to the control groups in the youngest age groups, but this is not the case in our study.~~ We therefore believe that selection factors are of minor importance.

We are lacking information of years of employment -for the maintenance workers and even for the office workers. Most of the train- and track maintenance workers, however, are recruited at an early age and are quite stable with only a small turnover. The same is the case for the office personnel. We cannot rule out the possibility that these groups have had a previous job with occupational noise exposure, but we assess the possibility for this to influence the results ~~to a significant degree~~ to be unlikely.

Before we conducted this study, there was a general understanding that train and track maintenance workers are at risk for getting noise induced hearing loss. Based on individual assessments of workers and their audiograms and using the diagnostic guidelines of the Norwegian Labor Inspection Authority, 70 to 76 percent were suspected to have NIHL. The prevalence according to these criteria was 63 percent in the internal control group with office workers. This indicates that the use of these criteria has strong limitations with respect to the ~~validly validity diagnosing of predicting~~ noise induced hearing loss.

To distinguish between noise induced and age related hearing loss based ~~solely~~ on audiograms ~~only~~ is problematic. Some indications of differences may be given by audiometric notches, but they are also present in workers without any noise exposure as shown in the present and other studies<sup>19,20</sup>.

~~The results might be valid for railway maintenance workers in other countries with similar type of work, noise exposure and legislation.~~

In conclusion, this cross-sectional study has detected a small average hearing loss among the older part of the 4627 male train and track maintenance workers compared with non-exposed workers in the same company and reference values from ISO 1999: 2013.

## Figure legends

Figure 1: Hearing threshold of male train and track maintenance workers compared to ISO 1999:2013 and an internal reference group of office workers. 50 percentile.

Figure 2: Hearing threshold of male train and track maintenance workers compared to ISO 1999:2013 and an internal reference group of office workers. 90 percentile.

### What this paper adds:

- Previous studies have suggested that railway maintenance workers are at risk for the development of noise induced hearing loss (NIHL).
- This study has detected only small hearing loss among older maintenance workers compared to reference values.
- Hearing loss meeting national criteria for NIHL and audiometric notches are highly prevalent among workers not exposed to noise and are therefore of limited use in the diagnosis of NIHL.

Field Code Changed

Field Code Changed

Formatted: Font: Calibri, 11 pt

Formatted: Font: +Body (Calibri), 11 pt

Formatted: Font: Calibri, 11 pt

Formatted: Font: +Body (Calibri), 11 pt

1  
2  
3  
4  
5  
6  
7  
8  
9  
10  
11  
12  
13  
14  
15  
16  
17  
18  
19  
20  
21  
22  
23  
24  
25  
26  
27  
28  
29  
30  
31  
32  
33  
34  
35  
36  
37  
38  
39  
40  
41  
42  
43  
44  
45  
46  
47  
48  
49  
50  
51  
52  
53  
54  
55  
56  
57  
58  
59  
60

For peer review only

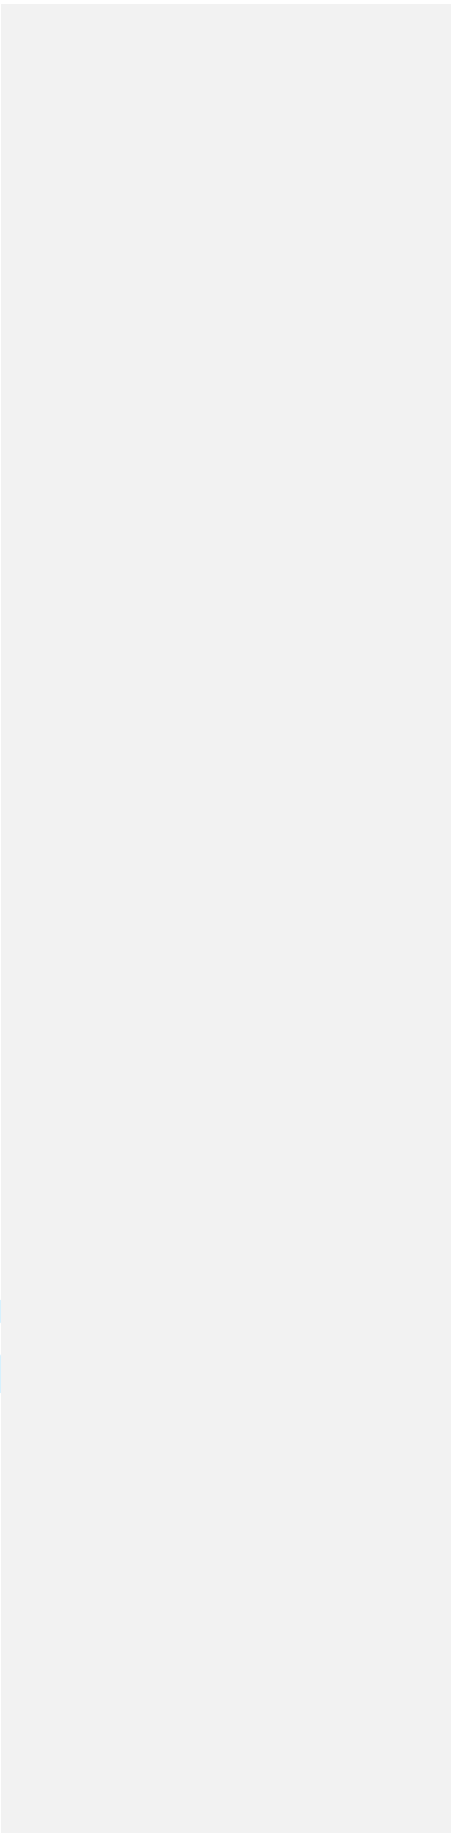



1  
2  
3  
4  
5  
6  
7  
8  
9  
10  
11  
12  
13  
14  
15  
16  
17  
18  
19  
20  
21  
22  
23  
24  
25  
26  
27  
28  
29  
30  
31  
32  
33  
34  
35  
36  
37  
38  
39  
40  
41  
42  
43  
44  
45  
46  
47  
48  
49  
50  
51  
52  
53  
54  
55  
56  
57  
58  
59  
60

### Acknowledgement

Per Frode Hove, Ingwill M. Hornkjøl and the rest of the staff at the Norwegian State Railways (NSB) Occupational Health Service are greatly acknowledged for providing exposure data, data from the medical records, and for valuable criticism and advice

### Contributorship statement

Arve Lie and Marit Skogstad have written the first draft of manuscript. Bo Engdahl and Kristian Tambs have given valuable advice on the manuscript and statistics. Torstein Seip Johnsen has provided the data from the OHS and has also been involved in the forming of the manuscript.

All the authors have given substantial contributions to conception and design, acquisition of data, analysis and interpretation of data, drafting and revising of the article and final approval of the version to be published.

### Competing Interests

There are no competing interests

### Data Sharing Statement

No additional data are available

### References

1. Samant Y, Parker D, Wergeland E, et al. The Norwegian Labour Inspectorate's Registry for Work-Related Diseases: data from 2006. *Int J Occup Environ Health* 2008;**14**(4):272-79.
2. Cruickshanks KJ, Wiley TL, Tweed TS, et al. Prevalence of hearing loss in older adults in Beaver Dam, Wisconsin. *The Epidemiology of Hearing Loss Study. AmJ Epidemiol* 1998;**148**(9):879-86.
3. Le Prell CG, Henderson D. Perspectives on Noise-Induced Hearing Loss. In: Le Prell CG, Henderson D, Fay RR, et al., eds. *Noise induced hearing loss: Springer New York, 2012:1-10.*
4. Kvestad E, Czajkowski N, Krog NH, et al. Heritability of hearing loss. *Epidemiology* 2012;**23**(2).
5. Tambs K, Hoffman HJ, Borchgrevink HM, et al. Hearing loss induced by noise, ear infections, and head injuries: results from the Nord-Trondelag Hearing Loss Study. *IntJ Audiol* 2003;**42**(2):89-105.
6. Virokannas H, Anttonen H, Niskanen J. Health risk assessment of noise, hand-arm vibration and cold in railway track maintenance. *International Journal of Industrial Ergonomics* 1994;**13**(3).
7. Tak S, Calvert GM. Hearing difficulty attributable to employment by industry and occupation: an analysis of the National Health Interview Survey--United States, 1997 to 2003. *J Occup Environ Med* 2008;**50**(1):46-56.
8. The Norwegian Labour Inspection Authority. *Audiometric testing in noise exposed workers (in Norwegian)*, 2013.
9. Lie A, Skogstad M, Johnsen TS, et al. Hearing status among Norwegian train drivers and train conductors. *Occup Med (Lond)* 2013;**63**(8):544-48.

Formatted: Font: Calibri, English (U.S.), Do not check spelling or grammar

Formatted: English (U.S.)

Formatted: Font: Calibri, English (U.S.), Do not check spelling or grammar

Formatted: English (U.S.)

Formatted: Font: Calibri, English (U.S.), Do not check spelling or grammar

Formatted: Font: Calibri, English (U.S.), Do not check spelling or grammar

Formatted: English (U.S.)

Formatted: Font: Calibri, English (U.S.), Do not check spelling or grammar

Formatted: English (U.S.)

Formatted: Font: Calibri, English (U.S.), Do not check spelling or grammar

Formatted: English (U.S.)

Formatted: Font: Calibri, English (U.S.), Do not check spelling or grammar

Formatted: English (U.S.)

Formatted: Font: Calibri, English (U.S.), Do not check spelling or grammar

Formatted: English (U.S.)

Formatted: Font: Calibri, English (U.S.), Do not check spelling or grammar

Formatted: English (U.S.)

Formatted: Font: Calibri, English (U.S.), Do not check spelling or grammar

10. Engdahl B, Tambs K, Borchgrevink HM, et al. Screened and unscreened hearing threshold levels for the adult population: results from the Nord-Trondelag Hearing Loss Study. *Int J Audiol* 2005;**44**(4).
11. International Organization for S. ISO 1999. Acoustics - Estimation of noise-induced hearing loss. International Standard 2013;**1999: 2013 (E)**(1).
12. McBride D, Williams S. Characteristics of the audiometric notch as a clinical sign of noise exposure. *Scand Audiol* 2001;**30**(2):106-11.
13. Coles RR, Lutman ME, Buffin JT. Guidelines on the diagnosis of noise-induced hearing loss for medicolegal purposes. *ClinOtolaryngolAllied Sci* 2000;**25**(4):264-73.
14. Rabinowitz PM, Galusha D, Slade MD, et al. Audiogram notches in noise-exposed workers. *Ear and Hearing* 2006;**27**(6):742-50.
15. Hyndman RJ, Fan Y. Sample quantiles in statistical packages. *The American Statistician* 1996;**50**(4):361-65.
16. Rubak T, Kock SA, Koefoed-Nielsen B, et al. The risk of noise-induced hearing loss in the Danish workforce. *Noise Health* 2006;**8**(31):80-87.
17. Bruehl P, Ivarsson A, Toremalm NG. Noise-induced hearing loss in an automobile sheet-metal pressing plant. *Scandinavian Audiology* 1994;**23**(2).
18. Engdahl B, Tambs K. Occupation and the risk of hearing impairment - results from the Nord-Trondelag study on hearing loss. *Scandinavian Journal of Work Environment & Health* 2010;**36**(3).
19. Nondahl DM, Shi X, Cruickshanks KJ, et al. Notched audiograms and noise exposure history in older adults. *Ear Hear* 2009;**30**(6):696-703.
20. Osei-Lah V, Yeoh LH. High frequency audiometric notch: An outpatient clinic survey. *Int J Audiol* 2010;**49**(2).

**Formatted:** Font: Calibri, English (U.S.), Do not check spelling or grammar

**Formatted:** English (U.S.)

**Formatted:** Font: Calibri, English (U.S.), Do not check spelling or grammar

**Formatted:** English (U.S.)

**Formatted:** Font: Calibri, English (U.S.), Do not check spelling or grammar

**Formatted:** English (U.S.)

**Formatted:** Font: Calibri, English (U.S.), Do not check spelling or grammar

**Formatted:** English (U.S.)

**Formatted:** Font: Calibri, English (U.S.), Do not check spelling or grammar

**Formatted:** English (U.S.)

**Formatted:** Font: Calibri, English (U.S.), Do not check spelling or grammar

**Formatted:** English (U.S.)

**Formatted:** Font: Calibri, English (U.S.), Do not check spelling or grammar

**Formatted:** English (U.S.)

**Formatted:** Font: Calibri, English (U.S.), Do not check spelling or grammar

**Formatted:** English (U.S.)

**Formatted:** Font: Calibri, English (U.S.), Do not check spelling or grammar

**Formatted:** English (U.S.)

**Formatted:** Font: Calibri, English (U.S.), Do not check spelling or grammar

**Formatted:** English (U.S.)

**Formatted:** Font: Calibri, English (U.S.), Do not check spelling or grammar

1  
2  
3  
4  
5  
6  
7  
8  
9  
10  
11  
12  
13  
14  
15  
16  
17  
18  
19  
20  
21  
22  
23  
24  
25  
26  
27  
28  
29  
30  
31  
32  
33  
34  
35  
36  
37  
38  
39  
40  
41  
42  
43  
44  
45  
46  
47  
48  
49  
50  
51  
52  
53  
54  
55  
56  
57  
58  
59  
60

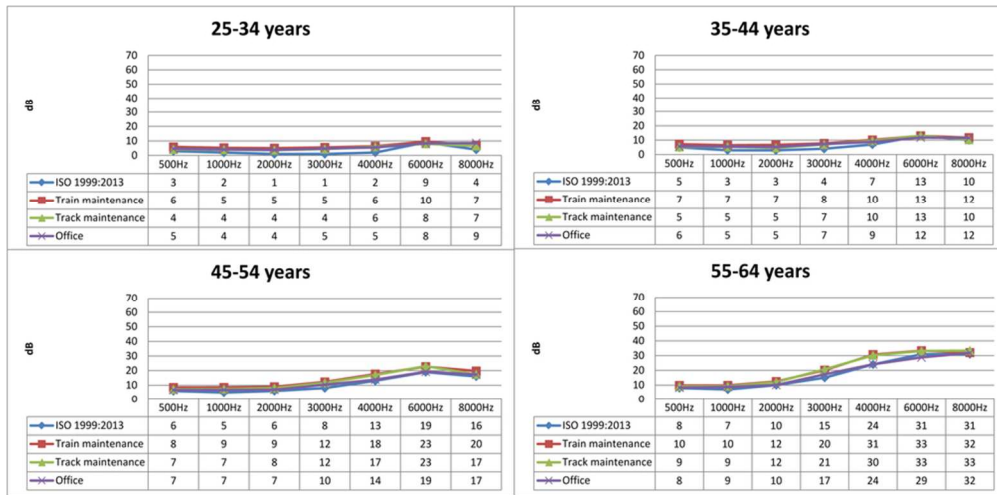

85x41mm (300 x 300 DPI)

er review only

1  
2  
3  
4  
5  
6  
7  
8  
9  
10  
11  
12  
13  
14  
15  
16  
17  
18  
19  
20  
21  
22  
23  
24  
25  
26  
27  
28  
29  
30  
31  
32  
33  
34  
35  
36  
37  
38  
39  
40  
41  
42  
43  
44  
45  
46  
47  
48  
49  
50  
51  
52  
53  
54  
55  
56  
57  
58  
59  
60

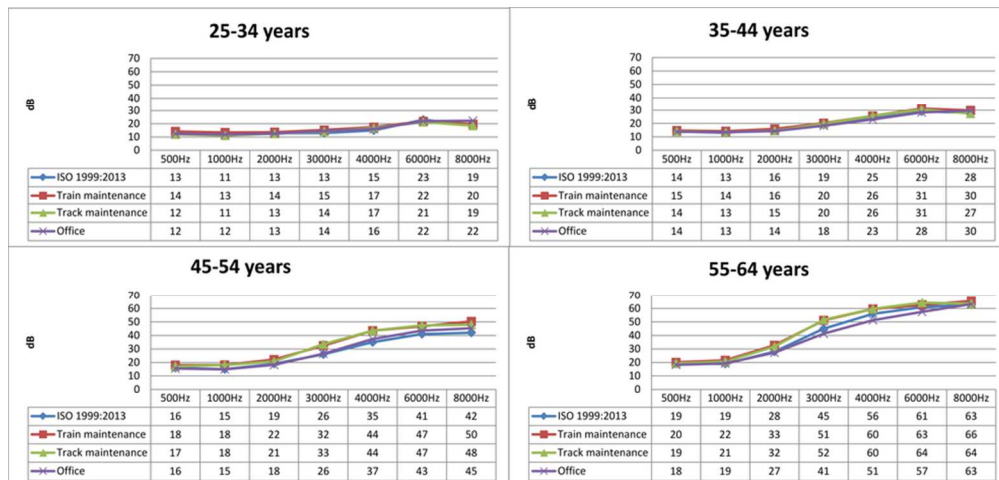

83x40mm (300 x 300 DPI)

er review only

STROBE 2007 (v4) Statement—Checklist of items that should be included in reports of *cross-sectional studies*

| Section/Topic             | Item # | Recommendation                                                                                                                                                                       | Reported on page # |
|---------------------------|--------|--------------------------------------------------------------------------------------------------------------------------------------------------------------------------------------|--------------------|
| Title and abstract        | 1      | (a) Indicate the study’s design with a commonly used term in the title or the abstract                                                                                               | 1,2                |
|                           |        | (b) Provide in the abstract an informative and balanced summary of what was done and what was found                                                                                  | 2                  |
| <b>Introduction</b>       |        |                                                                                                                                                                                      |                    |
| Background/rationale      | 2      | Explain the scientific background and rationale for the investigation being reported                                                                                                 | 4                  |
| Objectives                | 3      | State specific objectives, including any prespecified hypotheses                                                                                                                     | 4                  |
| <b>Methods</b>            |        |                                                                                                                                                                                      |                    |
| Study design              | 4      | Present key elements of study design early in the paper                                                                                                                              | 4,5                |
| Setting                   | 5      | Describe the setting, locations, and relevant dates, including periods of recruitment, exposure, follow-up, and data collection                                                      | 5                  |
| Participants              | 6      | (a) Give the eligibility criteria, and the sources and methods of selection of participants                                                                                          | 5                  |
| Variables                 | 7      | Clearly define all outcomes, exposures, predictors, potential confounders, and effect modifiers. Give diagnostic criteria, if applicable                                             | 5                  |
| Data sources/ measurement | 8*     | For each variable of interest, give sources of data and details of methods of assessment (measurement). Describe comparability of assessment methods if there is more than one group | 5                  |
| Bias                      | 9      | Describe any efforts to address potential sources of bias                                                                                                                            | 5                  |
| Study size                | 10     | Explain how the study size was arrived at                                                                                                                                            | 5,6                |
| Quantitative variables    | 11     | Explain how quantitative variables were handled in the analyses. If applicable, describe which groupings were chosen and why                                                         | 5                  |
| Statistical methods       | 12     | (a) Describe all statistical methods, including those used to control for confounding                                                                                                | 5,6                |
|                           |        | (b) Describe any methods used to examine subgroups and interactions                                                                                                                  | -                  |
|                           |        | (c) Explain how missing data were addressed                                                                                                                                          | -                  |
|                           |        | (d) If applicable, describe analytical methods taking account of sampling strategy                                                                                                   | -                  |
|                           |        | (e) Describe any sensitivity analyses                                                                                                                                                | -                  |
| <b>Results</b>            |        |                                                                                                                                                                                      |                    |

|                          |     |                                                                                                                                                                                                              |     |
|--------------------------|-----|--------------------------------------------------------------------------------------------------------------------------------------------------------------------------------------------------------------|-----|
| Participants             | 13* | (a) Report numbers of individuals at each stage of study—eg numbers potentially eligible, examined for eligibility, confirmed eligible, included in the study, completing follow-up, and analysed            | 6   |
|                          |     | (b) Give reasons for non-participation at each stage                                                                                                                                                         | -   |
|                          |     | (c) Consider use of a flow diagram                                                                                                                                                                           | -   |
| Descriptive data         | 14* | (a) Give characteristics of study participants (eg demographic, clinical, social) and information on exposures and potential confounders                                                                     | 6   |
|                          |     | (b) Indicate number of participants with missing data for each variable of interest                                                                                                                          | -   |
| Outcome data             | 15* | Report numbers of outcome events or summary measures                                                                                                                                                         | 7   |
| Main results             | 16  | (a) Give unadjusted estimates and, if applicable, confounder-adjusted estimates and their precision (eg, 95% confidence interval). Make clear which confounders were adjusted for and why they were included | 7   |
|                          |     | (b) Report category boundaries when continuous variables were categorized                                                                                                                                    | 7   |
|                          |     | (c) If relevant, consider translating estimates of relative risk into absolute risk for a meaningful time period                                                                                             | 7   |
| Other analyses           | 17  | Report other analyses done—eg analyses of subgroups and interactions, and sensitivity analyses                                                                                                               | -   |
| <b>Discussion</b>        |     |                                                                                                                                                                                                              |     |
| Key results              | 18  | Summarise key results with reference to study objectives                                                                                                                                                     | 7,8 |
| Limitations              | 19  | Discuss limitations of the study, taking into account sources of potential bias or imprecision. Discuss both direction and magnitude of any potential bias                                                   | 8   |
| Interpretation           | 20  | Give a cautious overall interpretation of results considering objectives, limitations, multiplicity of analyses, results from similar studies, and other relevant evidence                                   | 8,9 |
| Generalisability         | 21  | Discuss the generalisability (external validity) of the study results                                                                                                                                        | 9   |
| <b>Other information</b> |     |                                                                                                                                                                                                              |     |
| Funding                  | 22  | Give the source of funding and the role of the funders for the present study and, if applicable, for the original study on which the present article is based                                                | 6   |

\*Give information separately for cases and controls in case-control studies and, if applicable, for exposed and unexposed groups in cohort and cross-sectional studies.

**Note:** An Explanation and Elaboration article discusses each checklist item and gives methodological background and published examples of transparent reporting. The STROBE checklist is best used in conjunction with this article (freely available on the Web sites of PLoS Medicine at <http://www.plosmedicine.org/>, Annals of Internal Medicine at <http://www.annals.org/>, and Epidemiology at <http://www.epidem.com/>). Information on the STROBE Initiative is available at [www.strobe-statement.org](http://www.strobe-statement.org).

# BMJ Open

## A cross-sectional study of hearing thresholds among 4627 Norwegian train and track maintenance workers

|                                 |                                                                                                                                                                                                                                                                                                                                                                                                                                                                                            |
|---------------------------------|--------------------------------------------------------------------------------------------------------------------------------------------------------------------------------------------------------------------------------------------------------------------------------------------------------------------------------------------------------------------------------------------------------------------------------------------------------------------------------------------|
| Journal:                        | <i>BMJ Open</i>                                                                                                                                                                                                                                                                                                                                                                                                                                                                            |
| Manuscript ID:                  | bmjopen-2014-005529.R2                                                                                                                                                                                                                                                                                                                                                                                                                                                                     |
| Article Type:                   | Research                                                                                                                                                                                                                                                                                                                                                                                                                                                                                   |
| Date Submitted by the Author:   | 01-Sep-2014                                                                                                                                                                                                                                                                                                                                                                                                                                                                                |
| Complete List of Authors:       | Lie, Arve; STAMI, Occ med & epidemiology; Norwegian State Railways (NSB) Occupational Health Service, Oslo, Norway, Skogstad, Marit; National Institute of Occupational Health, Occupational Medicine and Epidemiology<br>Johnsen, Torstein; Norwegian State Railways (NSB) Occupational Health Service, Oslo, Norway,<br>Engdahl, Bo; Norwegian Institute of Public Health, Division of Mental Health<br>Tambs, Kristian; Norwegian Institute of Public Health, Division of Mental Health |
| <b>Primary Subject Heading</b>: | Occupational and environmental medicine                                                                                                                                                                                                                                                                                                                                                                                                                                                    |
| Secondary Subject Heading:      | Occupational and environmental medicine, Epidemiology                                                                                                                                                                                                                                                                                                                                                                                                                                      |
| Keywords:                       | PREVENTIVE MEDICINE, EPIDEMIOLOGY, OCCUPATIONAL & INDUSTRIAL MEDICINE, Audiology < OTOLARYNGOLOGY                                                                                                                                                                                                                                                                                                                                                                                          |
|                                 |                                                                                                                                                                                                                                                                                                                                                                                                                                                                                            |

SCHOLARONE™  
Manuscripts

only

1  
2  
3  
4  
5  
6  
7 **A cross-sectional study of hearing thresholds among 4627 Norwegian train and track**  
8 **maintenance workers**  
9

10 Arve Lie, MD<sup>12</sup>

11 Marit Skogstad, PhD<sup>1</sup>

12 Torstein Seip Johnsen, MD<sup>2</sup>

13 Bo Engdahl, PhD<sup>3</sup>

14 Kristian Tambs, PhD<sup>3</sup>

15  
16  
17  
18  
19  
20  
21 <sup>1</sup>: Department of Occupational Medicine and Epidemiology,

22 National Institute of Occupational Health, Oslo, Norway

23  
24 <sup>2</sup>: Norwegian State Railways (NSB) Occupational Health Service, Oslo, Norway

25  
26  
27 <sup>3</sup>: Norwegian Institute of Public Health, Oslo, Norway  
28  
29  
30

31 **Running title:**

32 Hearing thresholds among railway maintenance workers

33  
34 Corresponding author: Arve Lie, National Institute of Occupational Health, P.O. Box 8149

35  
36 Dep., N-0033 Oslo, Norway. Telephone: +4723195396, Fax : +4723195202,

37  
38 e-mail address: arve.lie@stami.no  
39

40  
41 **Word count article core:** 2391.

42  
43 **Word count abstract:** 254.

44  
45 **Number of figures and tables:** 4.

46  
47 **Number of references:** 19.  
48  
49  
50  
51  
52  
53  
54  
55  
56  
57  
58  
59  
60



## Abstract

### Objective

Railway workers performing maintenance work of trains and tracks could be at risk of developing noise induced hearing loss, since they are exposed to noise levels of 75- 90 dB(A) with peak exposures of 130-140 dB(C). The objective was to make a risk assessment by comparing the hearing thresholds among train and track maintenance workers with a reference group not exposed to noise and reference values from the ISO 1999.

### Design

Cross sectional

### Setting

A major Norwegian railway company.

### Participants

1897 male train and 2730 male track maintenance workers, all exposed to noise, and 2872 male railway traffic controllers and office workers not exposed to noise.

### Outcome measures

The primary outcome was the hearing threshold (pure tone audiometry, frequencies from 0.5 to 8 kHz) and the secondary the prevalence of audiometric notches (Coles notch) of the most recent audiogram.

### Results

The train and track maintenance workers 45 years or older had a small mean hearing loss in the 3-6 kHz area of 3-5 dB. The hearing loss was smaller among workers younger than 45 years. Audiometric notches were slightly more prevalent among the noise exposed (59-64%) compared to the controls (49%) for all age groups. Audiometric notches may therefore be a sensitive measure in disclosing an early hearing loss at a group level.

### Conclusion

Train and track maintenance workers 45 years or older on average have a slightly greater hearing loss and more audiometric notches compared to reference groups not exposed to noise. Younger (<45 years) workers have hearing thresholds comparable to the controls.

1  
2  
3  
4  
5  
6  
7  
8  
9  
10  
11  
12  
13  
14  
15  
16  
17  
18  
19  
20  
21  
22  
23  
24  
25  
26  
27  
28  
29  
30  
31  
32  
33  
34  
35  
36  
37  
38  
39  
40  
41  
42  
43  
44  
45  
46  
47  
48  
49  
50  
51  
52  
53  
54  
55  
56  
57  
58  
59  
60

**Strengths and limitations of the study**

Strengths:

- The size of the study with close to 100% participation rate
- The use of two groups for comparison
- High quality of the audiometric data and exposure assessment

Limitations:

- Cross sectional study with only the most recent audiogram from the participants

For peer review only

## Introduction

Noise induced hearing loss (NIHL) accounts for more than 60 percents of occupational disorders reported to the Norwegian Labor Inspection Authority<sup>1</sup>. Age is, however, the main cause for hearing loss<sup>2</sup>. Heritability, gender, smoking, high blood pressure, diabetes, high cholesterol level, the use of ototoxic medication and exposure to ototoxic chemicals may also affect the hearing and so may leisure time noise, first and foremost from the use of firearms<sup>3-5</sup>.

Train and track maintenance workers are occupationally exposed to noise. Noise measurements in the railway companies that we have studied reveal average 8 hour noise exposure levels of 75-90 dB(A) in both groups with peak exposures reaching 130-140 dB(C).

In studies of train and track maintenance workers, noise induced hearing loss has been described by Virokannas<sup>6</sup>, but the exposure levels were much higher than in our study. In the US National Health Interview Survey, railroad employees had the highest prevalence of hearing difficulties among the occupational groups examined, but the study did not present audiometric data, only self reported symptoms<sup>7</sup>.

Norwegian physicians are legally obliged to report occupational diseases, such as NIHL, to the Norwegian Labour Inspection Authority. More than 70 percents of the male 20-64 year old workers that we have studied, have an audiogram meeting the national criteria for NIHL, namely a sufficiently strong noise exposure and a hearing loss of 25 dB or more at either 3, 4 or 6 kHz, worse ear, or 20 dB for all of 3, 4 and 6 kHz, worse ear, not adjusted for age or sex<sup>8</sup>.

A recent study of hearing status among train drivers and train conductors in the Norwegian State Railways showed normal mean hearing threshold for their age<sup>9</sup>. Still many of them, just like the maintenance workers that we have studied, had audiograms compatible with the Norwegian criteria for NIHL.

The aim of this cross-sectional study was to assess the risk of noise induced hearing loss among train and track maintenance workers by comparing their audiograms with audiograms from a reference group of railway workers not exposed to noise and a Norwegian reference population (HUNT)<sup>10</sup> which recently has been included in the 2013 revision of the ISO 1999 reference data base<sup>11</sup>.

## Methods

### *Exposure assessment*

As a part of the risk assessment of the train and track maintenance workers, the occupational hygienists of the occupational health service (OHS) have conducted an extensive programme of measurements of the noise exposure by dosimetry and peak noise measurements. The exposure shows high variability, depending on the type of work being done. On an 8 hour average level the exposure varies from 75 dB(A) up to 90 dB(A), averaging 85-86 dB(A), and with peak exposures up to 130 dB(C) - 140 dB(C). Since the workers should wear hearing protection when the exposure exceeds 85 dB(A), the actual exposure to the ear will become somewhat lower.

### *The study group*

1  
2  
3 Most of the train and track maintenance workers have to perform an audiometric test as a part of a  
4 mandatory health assessment due to national and European Union regulations for railway safety  
5 personnel in order to be certified. The test is to be done before employment and later, depending on  
6 age, with 1-5 year intervals. All the tests are conducted by the occupational health service (OHS) of  
7 the Norwegian state railways (NSB).  
8

9  
10 The most recent available audiograms of the participating subjects, recorded during the period 1994-  
11 2011, were obtained from the electronic medical records along with age, sex and type of job  
12 information. Since there were only a few female maintenance workers, only male workers were  
13 used in the analysis.  
14

15 Audiograms from the train and track maintenance workers were compared with those of a control  
16 group of non-exposed male railway office workers, mainly doing traffic controlling, and with a similar  
17 social and educational background and salary as the maintenance workers. The study population was  
18 also compared with external reference data from the ISO 1999: 2013, annex B, table 2, based on a  
19 Norwegian reference population<sup>11</sup>.  
20  
21

### 22 *Hearing examination*

23  
24 Madsen Xeta Otometrics pure tone audiometric testing using a TDH-39P earphone headset in a  
25 soundproof booth at frequencies of 0.25, 0.5, 1, 2, 3, 4, 6 and 8 kHz was performed by trained  
26 nurses. The audiometric test was done in line with standard procedures according to the Norwegian  
27 Labour Inspection Authority<sup>8</sup>. The audiometer was calibrated every second year according to the  
28 requirements of the equipment provider.  
29  
30

31  
32 Since grouped median and percentile values from the better ear are used in the ISO 1990: 2013, the  
33 same values of the hearing threshold of frequencies from 0.5- 8 kHz were computed and compared  
34 to the values from reference groups.  
35

36 The prevalence of notches was calculated since audiometric notches are regarded as an indicator of  
37 NIHL<sup>12</sup>. The Coles notch was used. It is defined as hearing thresholds at 3, 4 or 6 kHz of 10 dB or more  
38 compared to that at 1 or 2 kHz and 8 kHz<sup>13</sup>. The criteria established by Coles et al. have been proven  
39 to correlate well with clinical assessments<sup>14</sup>  
40  
41

42 Finally, the prevalence of hearing loss meeting the Norwegian NIHL criteria, a hearing loss of 25 dB or  
43 more at either 3, 4 or 6 kHz or 20 dB for all of 3, 4 and 6 kHz, worse ear, was computed and  
44 compared to the reference group.  
45

### 46 *Ethical considerations*

47  
48 The audiograms have been obtained as a part of regular occupational health services work. Risk  
49 assessment of NIHL is a part of the OHS tasks. Therefore an application to the regional ethical  
50 committee is not necessary according to Norwegian regulations.  
51  
52

### 53 *Statistics*

54  
55 Descriptive statistics were used in this study. Groups were compared using chi-square tests for  
56 categorical variables and ANOVA for continuous variables. The data analysis was performed using  
57  
58  
59  
60

SPSS (IBM SPSS Statistics Version 20) with percentile values estimated by the FREQUENCIES /GROUPED command<sup>15</sup>. A significance level of 5% was chosen.

### Competing interests

None declared. The study did not receive any funding.

### Results

Audiograms from 1897 train- and 2730 track maintenance workers, all males, were compared to audiograms from 2872 male railway office workers working as traffic controllers or in other types of jobs without any significant noise exposure.

An overview of age distribution in the train- and track maintenance workers and non-exposed office workers is shown in table 1.

Table 1: Background data and noise exposure in male train and track maintenance workers compared to an internal male non noise exposed reference group.

|                                     | Age   | Train maintenance | Track maintenance | Internal ref. | P                   |
|-------------------------------------|-------|-------------------|-------------------|---------------|---------------------|
| Age, mean (SD)                      |       | 47.6 (11.9)       | 46.2 (13.0)       | 45.7 (11.8)   | <0.001 <sup>a</sup> |
| Age, N=                             | -24   | 118               | 286               | 129           |                     |
|                                     | 25-34 | 225               | 275               | 504           |                     |
|                                     | 35-44 | 330               | 529               | 692           |                     |
|                                     | 45-54 | 555               | 801               | 738           |                     |
|                                     | 55-64 | 669               | 839               | 809           |                     |
|                                     | Total | 1897              | 2730              | 2872          |                     |
| Occupational noise exposure (dB(A)) |       | 75-90 + peak      | 75-90 + peak      | < 70          |                     |

<sup>a</sup>) ANOVA

The average age and the distribution of age were similar in the 3 groups. The noise exposure of the train and track maintenance workers is in the order of 75-90 dB(A). In addition there may be peak exposures of 130-140 dB(C). Hearing protection in terms of ear muffs or ear plugs is to be used when the noise exposure exceeds 80 dB(A).

Figure 1 shows the grouped median values of the hearing thresholds of the maintenance workers, the internal control group and the ISO 1999. The largest difference between the noise exposed and the control groups, 2-7 dB for 3 kHz and 4 kHz, was found for the age groups 45 years or older compared with the control groups. The grouped 90 percentile (figure 2) of the hearing thresholds reveals similar findings with an elevated hearing threshold of 6-10 dB in the same age groups of the noise exposed workers compared to the control groups. In the younger age groups (25-44 years) there are only minor differences between those with noise exposure compared to the internal control group and ISO-standards.

The hearing loss, the prevalences of audiometric notches and NIHL criteria in the maintenance workers compared with the internal control group are shown in table 2.

Table 2: Hearing loss (better ear) and prevalence of audiometric notches (worse ear) and NIHL (worse ear) in male train and track maintenance workers compared to an internal male non noise exposed reference group.

|                                                                                          | Age   | Train maintenance | Track maintenance          | Internal ref. | P                   |
|------------------------------------------------------------------------------------------|-------|-------------------|----------------------------|---------------|---------------------|
| Hearing loss compared to the internal reference, mean 3,4 and 6 kHz, better ear (95% CI) |       |                   |                            |               |                     |
|                                                                                          | -24   | 2.3(0.8-3.7)      | 1.1(-0.1-2.3) <sup>b</sup> | 0 (Ref)       |                     |
|                                                                                          | 25-34 | 0.8(-0.5-2.1)     | 0.0(-1.2-1.3)              | 0 (Ref)       |                     |
|                                                                                          | 35-44 | 1.8(0.3-3.3)      | 1.1(-0.2-2.4)              | 0 (Ref)       |                     |
|                                                                                          | 45-54 | 3.3(1.6-5.0)      | 3.1(1.5-4.6)               | 0 (Ref)       |                     |
|                                                                                          | 55-64 | 4.6(2.5-6.6)      | 4.9(2.9-6.8)               | 0 (Ref)       |                     |
| Coles audiometric notch, prevalence, worse ear (%)                                       |       |                   |                            |               |                     |
|                                                                                          | -24   | 50                | 56                         | 39            | <0.001 <sup>c</sup> |
|                                                                                          | 25-34 | 50                | 53                         | 39            | <0.001              |
|                                                                                          | 35-44 | 59                | 62                         | 50            | <0.001              |
|                                                                                          | 45-54 | 65                | 71                         | 55            | <0.001              |
|                                                                                          | 55-64 | 60                | 66                         | 52            | <0.001              |
|                                                                                          | Total | 59                | 64                         | 49            | <0.001              |
| NIHL criteria hearing loss <sup>d</sup> , prevalence, worse ear, (%)                     |       |                   |                            |               |                     |
|                                                                                          | -24   | 26                | 21                         | 20            | 0.432 <sup>a</sup>  |
|                                                                                          | 25-34 | 36                | 29                         | 28            | 0.116               |
|                                                                                          | 35-44 | 63                | 56                         | 50            | <0.001              |
|                                                                                          | 45-54 | 87                | 85                         | 74            | <0.001              |
|                                                                                          | 55-64 | 95                | 95                         | 92            | 0.005               |
|                                                                                          | Total | 76                | 70                         | 63            | <0.001              |

<sup>a</sup>) ANOVA <sup>b</sup>) ANOVA, Bonferroni post hoc <sup>c</sup>) Chi-square test <sup>d</sup>) a hearing threshold of 25 dB or more at either 3, 4 or 6 kHz, worse ear, or 20 dB for all of 3, 4 and 6 kHz, worse ear.

From the age of 45 there is a significant hearing loss among the maintenance workers of 3-5 dB compared to the controls. In the younger age groups the hearing is comparable to that of the controls group.

An increase in audiometric notches in all groups with increasing age up to the age of 54 and then declining, is revealed with significantly higher prevalences in the exposed groups compared with the control group for all age groups.

The prevalence of the Norwegian criteria for NIHL is in line with the audiometric notches found in the present study (table 2), but is only significant for exposed workers compared to controls above 35 years. The prevalence of audiometric NIHL criteria is almost as high in the reference group (63%) as in the train- and track maintenance workers (70-76%).

The results indicate that there is only a small, but significant noise induced hearing loss in the noise sensitive area (3-6 kHz) in the exposed workers from the age of 35.

## Discussion

1  
2  
3 This cross-sectional study of 4627 male train- and track maintenance workers demonstrates hearing  
4 thresholds similar to that of the non-exposed groups, but the oldest workers have a small, but  
5 significantly greater hearing loss with more notched audiograms than the control group. This  
6 indicates a small noise induced hearing loss (NIHL) in the noise exposed groups. The magnitude of  
7 the hearing loss of the noise sensitive area (3-6 kHz) is in the order of 5 dB or less, which is about as  
8 expected. According to ISO 1999<sup>11</sup> an unprotected noise exposure of 85 and 90 dB(A) at an 8 hour  
9 daily basis will lead to a median expected hearing loss of 4 dB and 9 dB, respectively, after 10 years of  
10 exposure.  
11

12  
13 The hearing of the younger workers is close to normal. This is probably due to shorter time of noise  
14 exposure, better preventive measures, such as the use of noise protection and the use of hearing  
15 protection, during the last years and in line with studies of similar noise-exposed groups in the  
16 developed world<sup>16-18</sup>. The workers 45 years or older, however, had a small noise-induced hearing  
17 loss. This could be due to a longer time of noise exposure and former high levels of workplace noise.  
18 This finding is also in line with previous studies showing that railroad workers are at risk of getting  
19 NIHL<sup>6,7</sup>.  
20

21  
22 The prevalences of notched audiograms are statistically significantly higher among noise exposed  
23 workers compared to controls for all age groups but only for workers above 35 for the prevalence of  
24 the Norwegian NIHL criteria. This may indicate that a notched audiogram is more sensitive than the  
25 NIHL criteria in disclosing an early NIHL at a group level. The main problem with both the notched  
26 audiograms and the NIHL criteria, however, is the almost as high prevalence of these finding among  
27 the controls compared to the exposed. This means that the specificity is low, and these diagnostic  
28 criteria for NIHL are therefore of limited value at an individual level.  
29

30  
31 The strengths of the present study include a large number of maintenance workers and large control  
32 groups. We also assess the audiometric measurements to be of good quality. Since audiometric  
33 testing is mandatory for most of the workers, we assume that the participation rate is close to 100%.  
34 The use of two comparison groups strengthens the study. The results from the two comparison  
35 groups are very similar. Furthermore, the internal control group of office workers was examined by  
36 the same OHS professionals and with the same audiometric equipment as were the train and track  
37 maintenance workers.  
38

39  
40 There are, however, also some limitations of this study.  
41

42  
43 This cross sectional assessment is based on only one audiogram from each of the participants, the  
44 most recent measurement. Longitudinal data would be favorable in such a study, because selective  
45 drop-out may have occurred. Since selection in and selection out of work due to hearing loss is quite  
46 uncommon, we believe that the limitation of using cross-sectional data in this study is of minor  
47 importance.  
48

49  
50 Information of factors other than noise that may modify hearing loss such as smoking, high blood  
51 pressure, metabolic syndrome, diabetes, exposure to ototoxic medication or chemicals, leisure time  
52 noise exposure etc were not available. Thus possible confounders were not assessed. The  
53 maintenance workers have probably been more exposed to chemicals than the reference groups. For  
54 the other factors we have no reason to believe that they would influence the results since we doubt  
55 that they have a different prevalence among the workers compared with the controls.  
56  
57  
58  
59  
60

1  
2  
3 Most of the maintenance workers went through a health examination before they were employed,  
4 and a severe hearing loss would normally have been regarded as a disqualification preventing  
5 employment. One may therefore expect some selection at recruitment. The requirements regarding  
6 hearing acuity are not very strict, however, and identical for the maintenance workers and the  
7 control group of railway workers. We therefore believe that selection factors are of minor  
8 importance.  
9

10  
11 We are lacking information of years of employment for the maintenance workers and even for the  
12 office workers. Most of the train- and track maintenance workers, however, are recruited at an early  
13 age and are quite stable with only a small turnover. The same is the case for the office personnel.  
14 We cannot rule out the possibility that these groups have had a previous job with occupational noise  
15 exposure, but we assess the possibility for this to influence the results to be unlikely.  
16

17  
18 Before we conducted this study, there was a general perception that train and track maintenance  
19 workers are at risk for getting noise induced hearing loss. Based on individual assessments of workers  
20 and their audiograms and using the diagnostic guidelines of the Norwegian Labor Inspection  
21 Authority, 70 to 76 percent were suspected to have NIHL. The prevalence according to these criteria  
22 was 63 percent in the internal control group with office workers. This indicates that the use of these  
23 criteria has strong limitations with respect to the validity of predicting noise induced hearing loss.  
24

25  
26 To distinguish between noise induced and age related hearing loss based solely on audiograms is  
27 problematic. Some indications of differences may be given by audiometric notches, but they are also  
28 present in workers without any noise exposure as shown in the present and other studies<sup>19 20</sup>.  
29

30  
31 The results might be valid for male railway maintenance workers in other countries with similar type  
32 of work, noise exposure and legislation.  
33

34  
35 In conclusion, this cross-sectional study has detected a small average hearing loss among the older  
36 part of the 4627 male train and track maintenance workers compared with non-exposed workers in  
37 the same company and reference values from ISO 1999: 2013.  
38

39  
40  
41  
42 What this paper adds:

- 43 • Previous studies have suggested that railway maintenance workers are at risk for the development of noise induced hearing loss (NIHL).
  - 44 • This study has detected only small hearing loss among older maintenance workers compared to reference values.
  - 45 • Hearing loss meeting national criteria for NIHL and audiometric notches are highly prevalent among workers not exposed to noise and are therefore of limited use in the diagnosis of NIHL.
- 46  
47  
48  
49  
50  
51  
52  
53  
54  
55  
56  
57  
58  
59  
60



### **Acknowledgement**

Per Frode Hove, Ingvill M. Hornkjøl and the rest of the staff at the Norwegian State Railways (NSB) Occupational Health Service are greatly acknowledged for providing exposure data, data from the medical records, and for valuable criticism and advice

### **Contributorship statement**

Arve Lie and Marit Skogstad have written the first draft of manuscript. Bo Engdahl and Kristian Tambs have given valuable advice on the manuscript and statistics. Torstein Seip Johnsen has provided the data from the OHS and has also been involved in the forming of the manuscript.

All the authors have given substantial contributions to conception and design, acquisition of data, analysis and interpretation of data, drafting and revising of the article and final approval of the version to be published.

### **Competing Interests**

There are no competing interests

### **Data Sharing Statement**

No additional data are available

### **Figure legends**

Figure 1: Hearing threshold of male train and track maintenance workers compared to ISO 1999:2013 and an internal reference group of office workers. 50 percentile.

Figure 2: Hearing threshold of male train and track maintenance workers compared to ISO 1999:2013 and an internal reference group of office workers. 90 percentile.

## References

1. Samant Y, Parker D, Wergeland E, et al. The Norwegian Labour Inspectorate's Registry for Work-Related Diseases: data from 2006. *Int J Occup Environ Health* 2008;**14**(4):272-79.
2. Cruickshanks KJ, Wiley TL, Tweed TS, et al. Prevalence of hearing loss in older adults in Beaver Dam, Wisconsin. The Epidemiology of Hearing Loss Study. *Am J Epidemiol* 1998;**148**(9):879-86.
3. Le Prell CG, Henderson D. Perspectives on Noise-Induced Hearing Loss. In: Le Prell CG, Henderson D, Fay RR, et al., eds. *Noise induced hearing loss*: Springer New York, 2012:1-10.
4. Kvestad E, Czajkowski N, Krog NH, et al. Heritability of hearing loss. *Epidemiology* 2012;**23**(2).
5. Tambs K, Hoffman HJ, Borchgrevink HM, et al. Hearing loss induced by noise, ear infections, and head injuries: results from the Nord-Trøndelag Hearing Loss Study. *Int J Audiol* 2003;**42**(2):89-105.
6. Virokannas H, Anttonen H, Niskanen J. Health risk assessment of noise, hand-arm vibration and cold in railway track maintenance. *International Journal of Industrial Ergonomics* 1994;**13**(3).
7. Tak S, Calvert GM. Hearing difficulty attributable to employment by industry and occupation: an analysis of the National Health Interview Survey--United States, 1997 to 2003. *J Occup Environ Med* 2008;**50**(1):46-56.
8. The Norwegian Labour Inspection Authority. *Audiometric testing in noise exposed workers (in Norwegian)*, 2013.
9. Lie A, Skogstad M, Johnsen TS, et al. Hearing status among Norwegian train drivers and train conductors. *Occup Med (Lond)* 2013;**63**(8):544-48.
10. Engdahl B, Tambs K, Borchgrevink HM, et al. Screened and unscreened hearing threshold levels for the adult population: results from the Nord-Trøndelag Hearing Loss Study. *Int J Audiol* 2005;**44**(4).
11. International Organization for S. ISO 1999. *Acoustics - Estimation of noise-induced hearing loss. International Standard 2013*;1999: 2013 (E)(1).
12. McBride D, Williams S. Characteristics of the audiometric notch as a clinical sign of noise exposure. *Scand Audiol* 2001;**30**(2):106-11.
13. Coles RR, Lutman ME, Buffin JT. Guidelines on the diagnosis of noise-induced hearing loss for medicolegal purposes. *ClinOtolaryngolAllied Sci* 2000;**25**(4):264-73.
14. Rabinowitz PM, Galusha D, Slade MD, et al. Audiogram notches in noise-exposed workers. *Ear and Hearing* 2006;**27**(6):742-50.
15. Hyndman RJ, Fan Y. Sample quantiles in statistical packages. *The American Statistician* 1996;**50**(4):361-65.
16. Rubak T, Kock SA, Koefoed-Nielsen B, et al. The risk of noise-induced hearing loss in the Danish workforce. *Noise Health* 2006;**8**(31):80-87.
17. Bruehl P, Ivarsson A, Toremalm NG. Noise-induced hearing loss in an automobile sheet-metal pressing plant. *Scandinavian Audiology* 1994;**23**(2).
18. Engdahl B, Tambs K. Occupation and the risk of hearing impairment - results from the Nord-Trøndelag study on hearing loss. *Scandinavian Journal of Work Environment & Health* 2010;**36**(3).
19. Nondahl DM, Shi X, Cruickshanks KJ, et al. Notched audiograms and noise exposure history in older adults. *Ear Hear* 2009;**30**(6):696-703.
20. Osei-Lah V, Yeoh LH. High frequency audiometric notch: An outpatient clinic survey. *Int J Audiol* 2010;**49**(2).

1  
2  
3  
4  
5  
6  
7  
8  
9  
10 **A cross-sectional study of hearing thresholds among 4627 Norwegian train and track**  
11 **maintenance workers**

12  
13 Arve Lie, MD<sup>12</sup>

14 Marit Skogstad, PhD<sup>1</sup>

15  
16 Torstein Seip Johnsen, MD<sup>2</sup>

17 Bo Engdahl, PhD<sup>3</sup>

18  
19 Kristian Tambs, PhD<sup>3</sup>

20  
21  
22 <sup>1</sup>: Department of Occupational Medicine and Epidemiology,

23 National Institute of Occupational Health, Oslo, Norway

24  
25 <sup>2</sup>: Norwegian State Railways (NSB) Occupational Health Service, Oslo, Norway

26  
27 <sup>3</sup>: Norwegian Institute of Public Health, Oslo, Norway

28  
29  
30 **Running title:**

31 Hearing thresholds among railway maintenance workers

32  
33 Corresponding author: Arve Lie, National Institute of Occupational Health, P.O. Box 8149

34  
35 Dep., N-0033 Oslo, Norway. Telephone: +4723195396, Fax : +4723195202,

36  
37 e-mail address: arve.lie@stami.no

38  
39 **Word count article core:** [22702391](#).

40  
41 **Word count abstract:** [232254](#).

42  
43 **Number of figures and tables:** 4.

44  
45 **Number of references:** 19.

## Abstract

### Objective

Railway workers performing maintenance work of trains and tracks could be at risk of developing noise induced hearing loss, since they are exposed to noise levels of 75- 90 dB(A) with peak exposures of 130-140 dB(C). The objective was to make a risk assessment by comparing the hearing thresholds among train and track maintenance workers with a reference group not exposed to noise and reference values from the ISO 1999.

### Design

Cross sectional

### Setting

A major Norwegian railway company.

### Participants

1897 male train and 2730 male track maintenance workers, all exposed to noise, and 2872 male railway traffic controllers and office workers not exposed to noise.

### Outcome measures

The primary outcome was the hearing threshold (pure tone audiometry, frequencies from 0.5 to 8 kHz) and the secondary the prevalence of audiometric notches (Coles notch) of the most recent audiogram.

### Results

The train and track maintenance workers 45 years or older had a small mean hearing loss in the 3-6 kHz area of 3-5 dB. The hearing loss was smaller among workers younger than 45 years. Audiometric notches were slightly more prevalent among the noise exposed (59-64%) compared to the controls (49%) for all age groups. Audiometric notches may therefore be a sensitive measure in disclosing an early hearing loss at a group level.

### Conclusion

Train and track maintenance workers 45 years or older on average have a slightly greater hearing loss and more audiometric notches compared to reference groups not exposed to noise. Younger (<45 years) workers have hearing thresholds comparable to the controls.

1  
2  
3  
4  
5  
6  
7 **Strengths and limitations of the study**

8 Strengths:

- 9  
10
  - 11 • The size of the study with close to 100% participation rate
  - 12 • The use of two groups for comparison
  - 13 • High quality of the audiometric data and exposure assessment

14 Limitations:

- 15
  - 16 • Cross sectional study with only the most recent audiogram from the participants

17  
18  
19  
20  
21  
22  
23  
24  
25  
26  
27  
28  
29  
30  
31  
32  
33  
34  
35  
36  
37  
38  
39  
40  
41  
42  
43  
44  
45  
46  
47  
48  
49  
50  
51  
52  
53  
54  
55  
56  
57  
58  
59  
60

## Introduction

Noise induced hearing loss (NIHL) accounts for more than 60 percents of occupational disorders reported to the Norwegian Labor Inspection Authority<sup>1</sup>. Age is, however, the main cause for hearing loss<sup>2</sup>. Heritability, gender, smoking, high blood pressure, diabetes, high cholesterol level, the use of ototoxic medication and exposure to ototoxic chemicals may also affect the hearing and so may leisure time noise, first and foremost from the use of firearms<sup>3-5</sup>.

Field Code Changed

Field Code Changed

Field Code Changed

Train and track maintenance workers are occupationally exposed to noise. Noise measurements in the railway companies that we have studied reveal average 8 hour noise exposure levels of 75-90 dB(A) in both groups with peak exposures reaching 130-140 dB(C).

In studies of train and track maintenance workers, noise induced hearing loss has been described by Virokannas<sup>6</sup>, but the exposure levels were much higher than in our study. In the US National Health Interview Survey, railroad employees had the highest prevalence of hearing difficulties among the occupational groups examined, but the study did not present audiometric data, only self reported symptoms<sup>7</sup>.

Field Code Changed

Norwegian physicians are legally obliged to report occupational diseases, such as NIHL, to the Norwegian Labour Inspection Authority. More than 70 percents of the male 20-64 year old workers that we have studied, have an audiogram meeting the national criteria for NIHL, namely a sufficiently strong noise exposure and a hearing loss of 25 dB or more at either 3, 4 or 6 kHz, worse ear, or 20 dB for all of 3, 4 and 6 kHz, worse ear, not adjusted for age or sex<sup>8</sup>.

Field Code Changed

A recent study of hearing status among train drivers and train conductors in the Norwegian State Railways showed normal mean hearing threshold for their age<sup>9</sup>. Still many of them, just like the maintenance workers that we have studied, had audiograms compatible with the Norwegian criteria for NIHL.

Field Code Changed

The aim of this cross-sectional study was to assess the risk of noise induced hearing loss among train and track maintenance workers by comparing their audiograms with audiograms from a reference group of railway workers not exposed to noise and a Norwegian reference population (HUNT)<sup>10</sup> which recently has been included in the 2013 revision of the ISO 1999 reference data base<sup>11</sup>.

Field Code Changed

Field Code Changed

## Methods

### *Exposure assessment*

As a part of the risk assessment of the train and track maintenance workers, the occupational hygienists of the occupational health service (OHS) have conducted an extensive programme of measurements of the noise exposure by dosimetry and peak noise measurements. The exposure shows high variability, depending on the type of work being done. On an 8 hour average level the exposure varies from 75 dB(A) up to 90 dB(A), averaging 85-86 dB(A), and with peak exposures up to 130 dB(C) - 140 dB(C). Since the workers should wear hearing protection when the exposure exceeds 85 dB(A), the actual exposure to the ear will become somewhat lower.

### *The study group*

1  
2  
3  
4  
5  
6  
7 Most of the train and track maintenance workers have to perform an audiometric test as a part of a  
8 mandatory health assessment due to national and European Union regulations for railway safety  
9 personnel in order to be certified. The test is to be done before employment and later, depending on  
10 age, with 1-5 year intervals. All the tests are conducted by the occupational health service (OHS) of  
11 the Norwegian state railways (NSB).

12  
13 The most recent available audiograms of the participating subjects, recorded during the period 1994-  
14 2011, were obtained from the electronic medical records along with age, sex and type of job  
15 information. Since there were only a few female maintenance workers, only male workers were  
16 used in the analysis.

17  
18 Audiograms from the train and track maintenance workers were compared with those of a control  
19 group of non-exposed male railway office workers, mainly doing traffic controlling, and with a similar  
20 social and educational background and salary as the maintenance workers. The study population was  
21 also compared with external reference data from the ISO 1999: 2013, annex B, table 2, based on a  
22 Norwegian reference population<sup>11</sup>.

Field Code Changed

#### 23 24 *Hearing examination*

25  
26 Madsen Xeta Otometrics pure tone audiometric testing using a TDH-39P earphone headset in a  
27 soundproof booth at frequencies of 0.25, 0.5, 1, 2, 3, 4, 6 and 8 kHz was performed by trained  
28 nurses. The audiometric test was done in line with standard procedures according to the Norwegian  
29 Labour Inspection Authority<sup>8</sup>. The audiometer was calibrated every second year according to the  
30 requirements of the equipment provider.

Field Code Changed

31  
32 Since grouped median and percentile values from the better ear are used in the ISO 1990: 2013, the  
33 same values of the hearing threshold of frequencies from 0.5- 8 kHz were computed and compared  
34 to the values from reference groups.

35  
36 The prevalence of notches was calculated since audiometric notches are regarded as an indicator of  
37 NIHL<sup>12</sup>. The Coles notch was used. It is defined as hearing thresholds at 3, 4 or 6 kHz of 10 dB or more  
38 compared to that at 1 or 2 kHz and 8 kHz<sup>13</sup>. The criteria established by Coles et al. have been proven  
39 to correlate well with clinical assessments<sup>14</sup>.

Field Code Changed

Field Code Changed

Field Code Changed

40  
41 Finally, the prevalence of hearing loss meeting the Norwegian NIHL criteria, a hearing loss of 25 dB or  
42 more at either 3, 4 or 6 kHz or 20 dB for all of 3, 4 and 6 kHz, worse ear, was computed and  
43 compared to the reference group.

#### 44 45 *Ethical considerations*

46  
47 The audiograms have been obtained as a part of regular occupational health services work. Risk  
48 assessment of NIHL is a part of the OHS tasks. Therefore an application to the regional ethical  
49 committee is not necessary according to Norwegian regulations.

#### 50 51 *Statistics*

52  
53 Descriptive statistics were used in this study. Groups were compared using chi-square tests for  
54 categorical variables and ANOVA for continuous variables. The data analysis was performed using  
55  
56  
57  
58  
59  
60

SPSS (IBM SPSS Statistics Version 20) with percentile values estimated by the FREQUENCIES /GROUPED command<sup>15</sup>. A significance level of 5% was chosen.

Field Code Changed

#### Competing interests

None declared. The study did not receive any funding.

#### Results

Audiograms from 1897 train- and 2730 track maintenance workers, all males, were compared to audiograms from 2872 male railway office workers working as traffic controllers or in other types of jobs without any significant noise exposure.

An overview of age distribution in the train- and track maintenance workers and non-exposed office workers is shown in table 1.

Table 1: Background data and noise exposure in male train and track maintenance workers compared to an internal male non noise exposed reference group.

|                                     | Age   | Train maintenance | Track maintenance | Internal ref. | P                   |
|-------------------------------------|-------|-------------------|-------------------|---------------|---------------------|
| Age, mean (SD)                      |       | 47.6 (11.9)       | 46.2 (13.0)       | 45.7 (11.8)   | <0.001 <sup>a</sup> |
| Age, N=                             | -24   | 118               | 286               | 129           |                     |
|                                     | 25-34 | 225               | 275               | 504           |                     |
|                                     | 35-44 | 330               | 529               | 692           |                     |
|                                     | 45-54 | 555               | 801               | 738           |                     |
|                                     | 55-64 | 669               | 839               | 809           |                     |
|                                     | Total | 1897              | 2730              | 2872          |                     |
| Occupational noise exposure (dB(A)) |       | 75-90 + peak      | 75-90 + peak      | < 70          |                     |

<sup>a</sup>) ANOVA

The average age and the distribution of age were similar in the 3 groups. The noise exposure of the train and track maintenance workers is in the order of 75-90 dB(A). In addition there may be peak exposures of 130-140 dB(C). Hearing protection in terms of ear muffs or ear plugs is to be used when the noise exposure exceeds 80 dB(A).

Figure 1 shows the grouped median values of the hearing thresholds of the maintenance workers, the internal control group and the ISO 1999. The largest difference between the noise exposed and the control groups, 2-7 dB for 3 kHz and 4 kHz, was found for the age groups 45 years or older compared with the control groups. The grouped 90 percentile (figure 2) of the hearing thresholds reveals similar findings with an elevated hearing threshold of 6-10 dB in the same age groups of the noise exposed workers compared to the control groups. In the younger age groups (25-44 years) there are only minor differences between those with noise exposure compared to the internal control group and ISO-standards.

The hearing loss, the prevalences of audiometric notches and NIHL criteria in the maintenance workers compared with the internal control group are shown in table 2.



Table 2: Hearing loss (better ear) and prevalence of audiometric notches (worse ear) and NIHL (worse ear) in male train and track maintenance workers compared to an internal male non noise exposed reference group.

|                                                                                          | Age   | Train maintenance | Track maintenance          | Internal ref. | P                   |
|------------------------------------------------------------------------------------------|-------|-------------------|----------------------------|---------------|---------------------|
| Hearing loss compared to the internal reference, mean 3,4 and 6 kHz, better ear (95% CI) |       |                   |                            |               |                     |
|                                                                                          | -24   | 2.3(0.8-3.7)      | 1.1(-0.1-2.3) <sup>b</sup> | 0 (Ref)       |                     |
|                                                                                          | 25-34 | 0.8(-0.5-2.1)     | 0.0(-1.2-1.3)              | 0 (Ref)       |                     |
|                                                                                          | 35-44 | 1.8(0.3-3.3)      | 1.1(-0.2-2.4)              | 0 (Ref)       |                     |
|                                                                                          | 45-54 | 3.3(1.6-5.0)      | 3.1(1.5-4.6)               | 0 (Ref)       |                     |
|                                                                                          | 55-64 | 4.6(2.5-6.6)      | 4.9(2.9-6.8)               | 0 (Ref)       |                     |
| Coles audiometric notch, prevalence, worse ear (%)                                       |       |                   |                            |               |                     |
|                                                                                          | -24   | 50                | 56                         | 39            | <0.001 <sup>c</sup> |
|                                                                                          | 25-34 | 50                | 53                         | 39            | <0.001              |
|                                                                                          | 35-44 | 59                | 62                         | 50            | <0.001              |
|                                                                                          | 45-54 | 65                | 71                         | 55            | <0.001              |
|                                                                                          | 55-64 | 60                | 66                         | 52            | <0.001              |
|                                                                                          | Total | 59                | 64                         | 49            | <0.001              |
| NIHL criteria hearing loss <sup>d</sup> , prevalence, worse ear, (%)                     |       |                   |                            |               |                     |
|                                                                                          | -24   | 26                | 21                         | 20            | 0.432 <sup>a</sup>  |
|                                                                                          | 25-34 | 36                | 29                         | 28            | 0.116               |
|                                                                                          | 35-44 | 63                | 56                         | 50            | <0.001              |
|                                                                                          | 45-54 | 87                | 85                         | 74            | <0.001              |
|                                                                                          | 55-64 | 95                | 95                         | 92            | 0.005               |
|                                                                                          | Total | 76                | 70                         | 63            | <0.001              |

<sup>a</sup>) ANOVA <sup>b</sup>) ANOVA, Bonferroni post hoc <sup>c</sup>) Chi- square test <sup>d</sup>) [a hearing threshold of 25 dB or more at either 3, 4 or 6 kHz, worse ear, or 20 dB for all of 3, 4 and 6 kHz, worse ear.](#)

From the age of 45 there is a significant hearing loss among the maintenance workers of 3-5 dB compared to the controls. In the younger age groups the hearing is comparable to that of the controls group.

An increase in audiometric notches in all groups with increasing age up to the age of 54 and then declining, is revealed with a significant higher prevalences in the exposed groups compared with the control group for all age groups.

The prevalence of the Norwegian criteria for NIHL is in line with the audiometric notches found in the present study (table 2), [but is only significant for exposed workers compared to controls above 35 years](#). The prevalence of audiometric NIHL criteria is almost as high in the reference group (63%) as in the train- and track maintenance workers (70-76%).

The results indicate that there is only a small, but significant noise induced hearing loss in the noise sensitive area (3-6 kHz) in the exposed workers from the age of 35.

## Discussion

This cross-sectional study of 4627 male train- and track maintenance workers demonstrates hearing thresholds similar to that of the non-exposed groups, but the oldest workers have a small, but significantly greater hearing loss with more notched audiograms than the control group. This indicates a small noise induced hearing loss (NIHL) in the noise exposed groups. The magnitude of the hearing loss of the noise sensitive area (3-6 kHz) is in the order of 5 dB or less, which is about as expected. According to ISO 1999<sup>11</sup> an unprotected noise exposure of 85 and 90 dB(A) at an 8 hour daily basis will lead to a median expected hearing loss of 4 dB and 9 dB, respectively, after 10 years of exposure.

Field Code Changed

The hearing of the younger workers is close to normal. This is probably due to shorter time of noise exposure, better preventive measures, such as the use of noise protection and the use of hearing protection, during the last years and in line with studies of similar noise-exposed groups in the developed world<sup>16-18</sup>. The workers 45 years or older, however, had a small noise-induced hearing loss. This could be due to a longer time of noise exposure and former high levels of workplace noise. This finding is also in line with previous studies showing that railroad workers are at risk of getting NIHL<sup>6,7</sup>.

Field Code Changed

Field Code Changed

Field Code Changed

The prevalences of notched audiograms are statistically significantly higher among noise exposed workers compared to controls for all age groups but only for workers above 35 for the prevalence of the Norwegian NIHL criteria. This may indicate that a notched audiogram is more sensitive than the NIHL criteria in disclosing an early NIHL at a group level. The main problem with both the notched audiograms and the NIHL criteria, however, is the almost as high prevalence of these finding among the controls compared to the exposed. This means that the specificity is low, and these diagnostic criteria for NIHL are therefore of limited value at an individual level.

Formatted: Default Paragraph Font, Font: (Default) +Body (Calibri), Font color: Auto, English (U.S.)

Formatted: Default Paragraph Font, Font: (Default) +Body (Calibri), Font color: Auto, English (U.S.)

Formatted: Default Paragraph Font, Font: (Default) +Body (Calibri), Font color: Auto, English (U.S.)

The strengths of the present study include a large number of maintenance workers and large control groups. We also assess the audiometric measurements to be of good quality. Since audiometric testing is mandatory for most of the workers, we assume that the participation rate is close to 100%. The use of two comparison groups strengthens the study. The results from the two comparison groups are very similar. Furthermore, the internal control group of office workers was examined by the same OHS professionals and with the same audiometric equipment as were the train and track maintenance workers.

There are, however, also some limitations of this study.

This cross sectional assessment is based on only one audiogram from each of the participants, the most recent measurement. Longitudinal data would be favorable in such a study, because selective drop-out may have occurred. Since selection in and selection out of work due to hearing loss is quite uncommon, we believe that the limitation of using cross-sectional data in this study is of minor importance.

Information of factors other than noise that may modify hearing loss such as smoking, high blood pressure, metabolic syndrome, diabetes, exposure to ototoxic medication or chemicals, leisure time noise exposure etc were not available. Thus possible confounders were not assessed. The maintenance workers have probably been more exposed to chemicals than the reference groups. For the other factors we have no reason to believe that they would influence the results since we doubt that they have a different prevalence among the workers compared with the controls.

1  
2  
3  
4  
5  
6  
7 Most of the maintenance workers went through a health examination before they were employed,  
8 and a severe hearing loss would normally have been regarded as a disqualification preventing  
9 employment. One may therefore expect some selection at recruitment. The requirements regarding  
10 hearing acuity are not very strict, however, and identical for the maintenance workers and the  
11 control group of railway workers. We therefore believe that selection factors are of minor  
12 importance.

13  
14 We are lacking information of years of employment for the maintenance workers and even for the  
15 office workers. Most of the train- and track maintenance workers, however, are recruited at an early  
16 age and are quite stable with only a small turnover. The same is the case for the office personnel.  
17 We cannot rule out the possibility that these groups have had a previous job with occupational noise  
18 exposure, but we assess the possibility for this to influence the results to be unlikely.

19  
20 Before we conducted this study, there was a general perception that train and track maintenance  
21 workers are at risk for getting noise induced hearing loss. Based on individual assessments of workers  
22 and their audiograms and using the diagnostic guidelines of the Norwegian Labor Inspection  
23 Authority, 70 to 76 percent were suspected to have NIHL. The prevalence according to these criteria  
24 was 63 percent in the internal control group with office workers. This indicates that the use of these  
25 criteria has strong limitations with respect to the validity of predicting noise induced hearing loss.

26  
27 To distinguish between noise induced and age related hearing loss based solely on audiograms is  
28 problematic. Some indications of differences may be given by audiometric notches, but they are also  
29 present in workers without any noise exposure as shown in the present and other studies<sup>19 20</sup>.

30  
31 The results might be valid for male railway maintenance workers in other countries with similar type  
32 of work, noise exposure and legislation.

33  
34 In conclusion, this cross-sectional study has detected a small average hearing loss among the older  
35 part of the 4627 male train and track maintenance workers compared with non-exposed workers in  
36 the same company and reference values from ISO 1999: 2013.

#### 37 38 39 40 41 **Figure legends**

42  
43 Figure 1: Hearing threshold of male train and track maintenance workers compared to ISO 1999:2013  
44 and an internal reference group of office workers. 50 percentile.

45  
46 Figure 2: Hearing threshold of male train and track maintenance workers compared to ISO 1999:2013  
47 and an internal reference group of office workers. 90 percentile.

Field Code Changed

Field Code Changed

1  
2  
3  
4  
5  
6  
7  
8  
9  
10  
11  
12  
13  
14  
15  
16  
17  
18  
19  
20  
21  
22  
23  
24  
25  
26  
27  
28  
29  
30  
31  
32  
33  
34  
35  
36  
37  
38  
39  
40  
41  
42  
43  
44  
45  
46  
47  
48  
49  
50  
51  
52  
53  
54  
55  
56  
57  
58  
59  
60

What this paper adds:

- Previous studies have suggested that railway maintenance workers are at risk for the development of noise induced hearing loss (NIHL).
- This study has detected only small hearing loss among older maintenance workers compared to reference values.
- Hearing loss meeting national criteria for NIHL and audiometric notches are highly prevalent among workers not exposed to noise and are therefore of limited use in the diagnosis of NIHL.

For peer review only

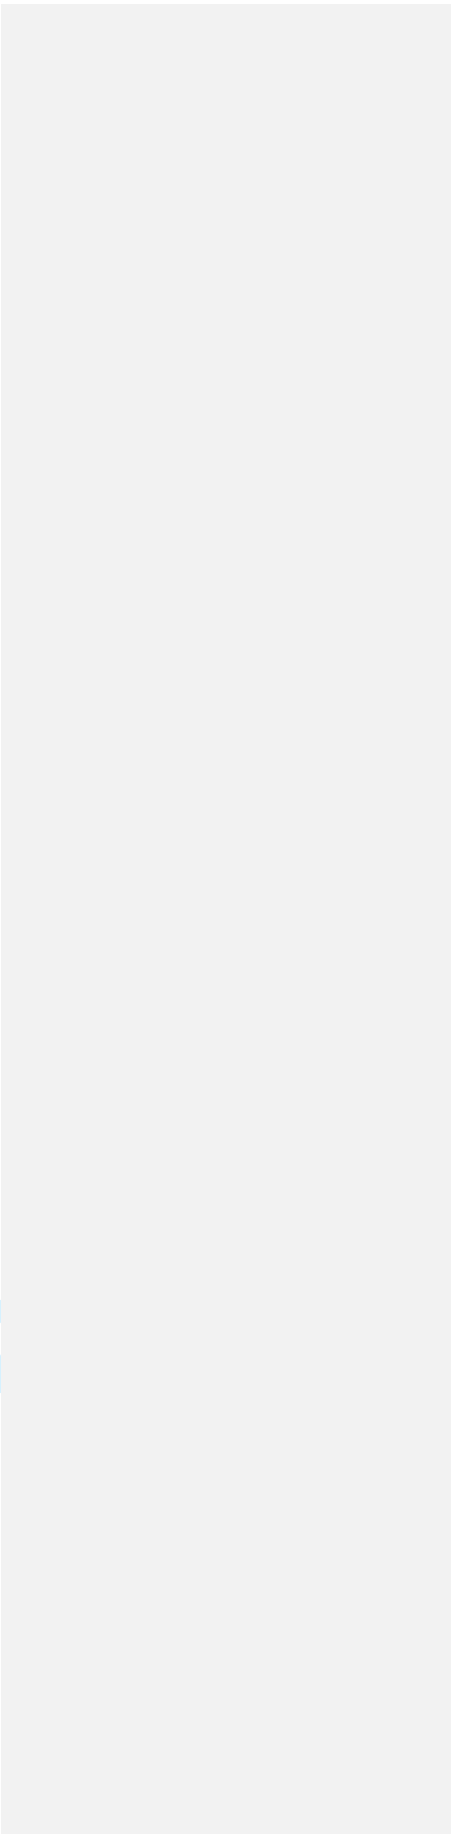

1  
2  
3  
4  
5  
6  
7  
8  
9  
10 **Acknowledgement**

11 Per Frode Hove, Ingvill M. Hornkjøl and the rest of the staff at the Norwegian State Railways (NSB)  
12 Occupational Health Service are greatly acknowledged for providing exposure data, data from the  
13 medical records, and for valuable criticism and advice  
14

15  
16 **Contributorship statement**

17 Arve Lie and Marit Skogstad have written the first draft of manuscript. Bo Engdahl and Kristian Tambs  
18 have given valuable advice on the manuscript and statistics. Torstein Seip Johnsen has provided the  
19 data from the OHS and has also been involved in the forming of the manuscript.  
20

21 All the authors have given substantial contributions to conception and design, acquisition of data,  
22 analysis and interpretation of data, drafting and revising of the article and final approval of the  
23 version to be published.  
24

25 **Competing Interests**

26 There are no competing interests  
27

28  
29 **Data Sharing Statement**

30 No additional data are available  
31  
32  
33  
34  
35  
36  
37  
38  
39  
40  
41  
42  
43  
44  
45  
46  
47  
48  
49  
50  
51  
52  
53  
54  
55  
56  
57  
58  
59  
60

## References

1. Samant Y, Parker D, Wergeland E, et al. The Norwegian Labour Inspectorate's Registry for Work-Related Diseases: data from 2006. *Int J Occup Environ Health* 2008;**14**(4):272-79.
2. Cruickshanks KJ, Wiley TL, Tweed TS, et al. Prevalence of hearing loss in older adults in Beaver Dam, Wisconsin. The Epidemiology of Hearing Loss Study. *Am J Epidemiol* 1998;**148**(9):879-86.
3. Le Prell CG, Henderson D. Perspectives on Noise-Induced Hearing Loss. In: Le Prell CG, Henderson D, Fay RR, et al., eds. *Noise induced hearing loss*: Springer New York, 2012:1-10.
4. Kvestad E, Czajkowski N, Krog NH, et al. Heritability of hearing loss. *Epidemiology* 2012;**23**(2).
5. Tambs K, Hoffman HJ, Borchgrevink HM, et al. Hearing loss induced by noise, ear infections, and head injuries: results from the Nord-Trøndelag Hearing Loss Study. *Int J Audiol* 2003;**42**(2):89-105.
6. Virokannas H, Anttonen H, Niskanen J. Health risk assessment of noise, hand-arm vibration and cold in railway track maintenance. *International Journal of Industrial Ergonomics* 1994;**13**(3).
7. Tak S, Calvert GM. Hearing difficulty attributable to employment by industry and occupation: an analysis of the National Health Interview Survey--United States, 1997 to 2003. *J Occup Environ Med* 2008;**50**(1):46-56.
8. The Norwegian Labour Inspection Authority. *Audiometric testing in noise exposed workers (in Norwegian)*, 2013.
9. Lie A, Skogstad M, Johnsen TS, et al. Hearing status among Norwegian train drivers and train conductors. *Occup Med (Lond)* 2013;**63**(8):544-48.
10. Engdahl B, Tambs K, Borchgrevink HM, et al. Screened and unscreened hearing threshold levels for the adult population: results from the Nord-Trøndelag Hearing Loss Study. *Int J Audiol* 2005;**44**(4).
11. International Organization for S. ISO 1999. *Acoustics - Estimation of noise-induced hearing loss*. International Standard 2013;**1999: 2013 (E)**(1).
12. McBride D, Williams S. Characteristics of the audiometric notch as a clinical sign of noise exposure. *Scand Audiol* 2001;**30**(2):106-11.
13. Coles RR, Lutman ME, Buffin JT. Guidelines on the diagnosis of noise-induced hearing loss for medicolegal purposes. *ClinOtolaryngolAllied Sci* 2000;**25**(4):264-73.
14. Rabinowitz PM, Galusha D, Slade MD, et al. Audiogram notches in noise-exposed workers. *Ear and Hearing* 2006;**27**(6):742-50.
15. Hyndman RJ, Fan Y. Sample quantiles in statistical packages. *The American Statistician* 1996;**50**(4):361-65.
16. Rubak T, Kock SA, Koefoed-Nielsen B, et al. The risk of noise-induced hearing loss in the Danish workforce. *Noise Health* 2006;**8**(31):80-87.
17. Bruehl P, Ivarsson A, Toremalm NG. Noise-induced hearing loss in an automobile sheet-metal pressing plant. *Scandinavian Audiology* 1994;**23**(2).
18. Engdahl B, Tambs K. Occupation and the risk of hearing impairment - results from the Nord-Trøndelag study on hearing loss. *Scandinavian Journal of Work Environment & Health* 2010;**36**(3).
19. Nondahl DM, Shi X, Cruickshanks KJ, et al. Notched audiograms and noise exposure history in older adults. *Ear Hear* 2009;**30**(6):696-703.
20. Osei-Lah V, Yeoh LH. High frequency audiometric notch: An outpatient clinic survey. *Int J Audiol* 2010;**49**(2).

1  
2  
3  
4  
5  
6  
7  
8  
9  
10  
11  
12  
13  
14  
15  
16  
17  
18  
19  
20  
21  
22  
23  
24  
25  
26  
27  
28  
29  
30  
31  
32  
33  
34  
35  
36  
37  
38  
39  
40  
41  
42  
43  
44  
45  
46  
47  
48  
49  
50  
51  
52  
53  
54  
55  
56  
57  
58  
59  
60

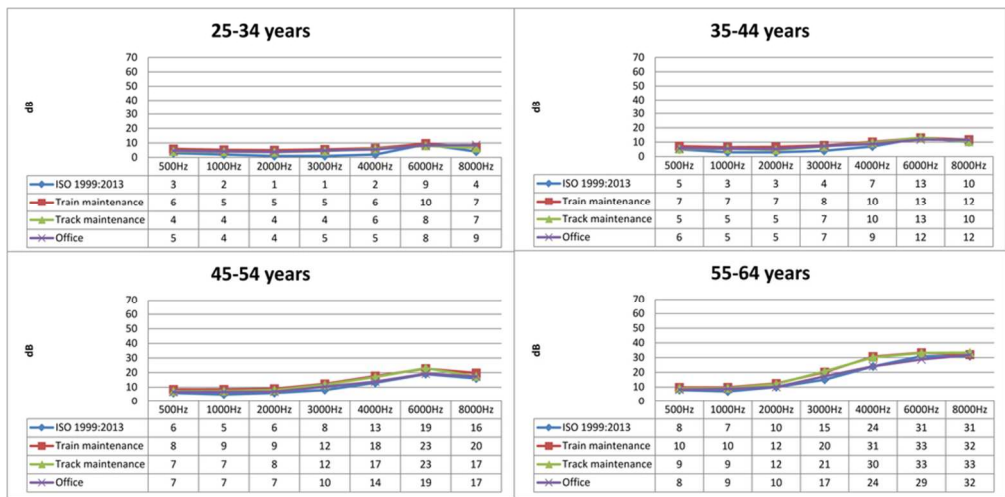

85x41mm (300 x 300 DPI)

er review only

1  
2  
3  
4  
5  
6  
7  
8  
9  
10  
11  
12  
13  
14  
15  
16  
17  
18  
19  
20  
21  
22  
23  
24  
25  
26  
27  
28  
29  
30  
31  
32  
33  
34  
35  
36  
37  
38  
39  
40  
41  
42  
43  
44  
45  
46  
47  
48  
49  
50  
51  
52  
53  
54  
55  
56  
57  
58  
59  
60

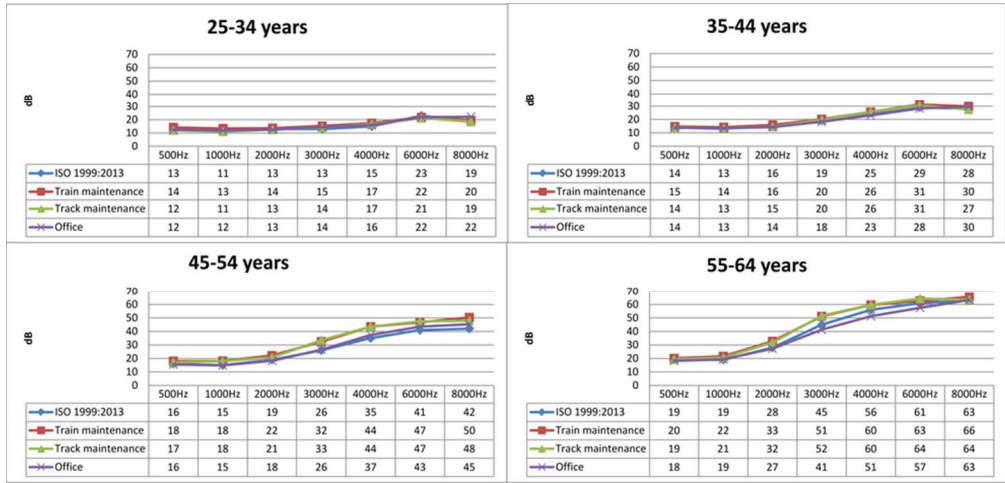

83x40mm (300 x 300 DPI)

er review only



STROBE 2007 (v4) Statement—Checklist of items that should be included in reports of *cross-sectional studies*

| Section/Topic                | Item # | Recommendation                                                                                                                                                                       | Reported on page # |
|------------------------------|--------|--------------------------------------------------------------------------------------------------------------------------------------------------------------------------------------|--------------------|
| Title and abstract           | 1      | (a) Indicate the study's design with a commonly used term in the title or the abstract                                                                                               | 1,2                |
|                              |        | (b) Provide in the abstract an informative and balanced summary of what was done and what was found                                                                                  | 2                  |
| <b>Introduction</b>          |        |                                                                                                                                                                                      |                    |
| Background/rationale         | 2      | Explain the scientific background and rationale for the investigation being reported                                                                                                 | 4                  |
| Objectives                   | 3      | State specific objectives, including any prespecified hypotheses                                                                                                                     | 4                  |
| <b>Methods</b>               |        |                                                                                                                                                                                      |                    |
| Study design                 | 4      | Present key elements of study design early in the paper                                                                                                                              | 4,5                |
| Setting                      | 5      | Describe the setting, locations, and relevant dates, including periods of recruitment, exposure, follow-up, and data collection                                                      | 5                  |
| Participants                 | 6      | (a) Give the eligibility criteria, and the sources and methods of selection of participants                                                                                          | 5                  |
| Variables                    | 7      | Clearly define all outcomes, exposures, predictors, potential confounders, and effect modifiers. Give diagnostic criteria, if applicable                                             | 5                  |
| Data sources/<br>measurement | 8*     | For each variable of interest, give sources of data and details of methods of assessment (measurement). Describe comparability of assessment methods if there is more than one group | 5                  |
| Bias                         | 9      | Describe any efforts to address potential sources of bias                                                                                                                            | 5                  |
| Study size                   | 10     | Explain how the study size was arrived at                                                                                                                                            | 5,6                |
| Quantitative variables       | 11     | Explain how quantitative variables were handled in the analyses. If applicable, describe which groupings were chosen and why                                                         | 5                  |
| Statistical methods          | 12     | (a) Describe all statistical methods, including those used to control for confounding                                                                                                | 5,6                |
|                              |        | (b) Describe any methods used to examine subgroups and interactions                                                                                                                  | -                  |
|                              |        | (c) Explain how missing data were addressed                                                                                                                                          | -                  |
|                              |        | (d) If applicable, describe analytical methods taking account of sampling strategy                                                                                                   | -                  |
|                              |        | (e) Describe any sensitivity analyses                                                                                                                                                | -                  |
| <b>Results</b>               |        |                                                                                                                                                                                      |                    |

|                          |     |                                                                                                                                                                                                              |     |
|--------------------------|-----|--------------------------------------------------------------------------------------------------------------------------------------------------------------------------------------------------------------|-----|
| Participants             | 13* | (a) Report numbers of individuals at each stage of study—eg numbers potentially eligible, examined for eligibility, confirmed eligible, included in the study, completing follow-up, and analysed            | 6   |
|                          |     | (b) Give reasons for non-participation at each stage                                                                                                                                                         | -   |
|                          |     | (c) Consider use of a flow diagram                                                                                                                                                                           | -   |
| Descriptive data         | 14* | (a) Give characteristics of study participants (eg demographic, clinical, social) and information on exposures and potential confounders                                                                     | 6   |
|                          |     | (b) Indicate number of participants with missing data for each variable of interest                                                                                                                          | -   |
| Outcome data             | 15* | Report numbers of outcome events or summary measures                                                                                                                                                         | 7   |
| Main results             | 16  | (a) Give unadjusted estimates and, if applicable, confounder-adjusted estimates and their precision (eg, 95% confidence interval). Make clear which confounders were adjusted for and why they were included | 7   |
|                          |     | (b) Report category boundaries when continuous variables were categorized                                                                                                                                    | 7   |
|                          |     | (c) If relevant, consider translating estimates of relative risk into absolute risk for a meaningful time period                                                                                             | 7   |
| Other analyses           | 17  | Report other analyses done—eg analyses of subgroups and interactions, and sensitivity analyses                                                                                                               | -   |
| <b>Discussion</b>        |     |                                                                                                                                                                                                              |     |
| Key results              | 18  | Summarise key results with reference to study objectives                                                                                                                                                     | 7,8 |
| Limitations              | 19  | Discuss limitations of the study, taking into account sources of potential bias or imprecision. Discuss both direction and magnitude of any potential bias                                                   | 8   |
| Interpretation           | 20  | Give a cautious overall interpretation of results considering objectives, limitations, multiplicity of analyses, results from similar studies, and other relevant evidence                                   | 8,9 |
| Generalisability         | 21  | Discuss the generalisability (external validity) of the study results                                                                                                                                        | 9   |
| <b>Other information</b> |     |                                                                                                                                                                                                              |     |
| Funding                  | 22  | Give the source of funding and the role of the funders for the present study and, if applicable, for the original study on which the present article is based                                                | 6   |

\*Give information separately for cases and controls in case-control studies and, if applicable, for exposed and unexposed groups in cohort and cross-sectional studies.

**Note:** An Explanation and Elaboration article discusses each checklist item and gives methodological background and published examples of transparent reporting. The STROBE checklist is best used in conjunction with this article (freely available on the Web sites of PLoS Medicine at <http://www.plosmedicine.org/>, Annals of Internal Medicine at <http://www.annals.org/>, and Epidemiology at <http://www.epidem.com/>). Information on the STROBE Initiative is available at [www.strobe-statement.org](http://www.strobe-statement.org).
